# Supplementary material for: Enaminone-Derived Pyrazoles with Antimicrobial Activity
Source: Hindawi journal article supplement (doi:10.1155/2019/2467970), 2019-11-07
Supplement: f1 [file 2467970.f1.pdf]

PROTON DMSO (C:\Bruker\TOPSPIN) abari 25

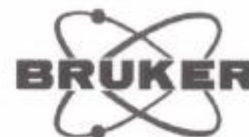

*repeated*

Current Data Parameters  
NAME drMashooq-PD-1a  
EXPNO 10  
PROCNO 1

*P-1*

F2 - Acquisition Parameters

Date\_ 20181015  
Time 12.37  
INSTRUM spect  
PROBHD 5 mm CPTCI 1H-  
PULPROG zg30  
TD 65536  
SOLVENT DMSO  
NS 16  
DS 2  
SWH 14097.744 Hz  
FIDRES 0.215115 Hz  
AQ 2.3243434 sec  
RG 10.32  
DW 35.467 usec  
DE 31.86 usec  
TE 295.0 K  
D1 1.00000000 sec  
TD0 1

===== CHANNEL f1 =====

SFO1 700.1743238 MHz  
NUC1 1H  
P1 8.00 usec  
PLW1 9.64999962 W

F2 - Processing parameters

SI 65536  
SF 700.1700000 MHz  
WDW EM  
SSB 0  
LB 0.30 Hz  
GB 0  
PC 1.00

*3.7-3.9 (4H, s,  $\text{OCH}_3$ )*

*+//...//...info*

*6.15- 6.17 (2H, m, ArH)*

*6.86 (1H, d, J= 7Hz, pyrrole)*

*7.79 (1H, d, J= 7Hz, pyrrole)*

*11.8 (1H, s, NH, broad)*

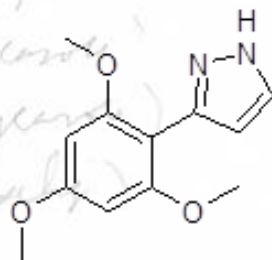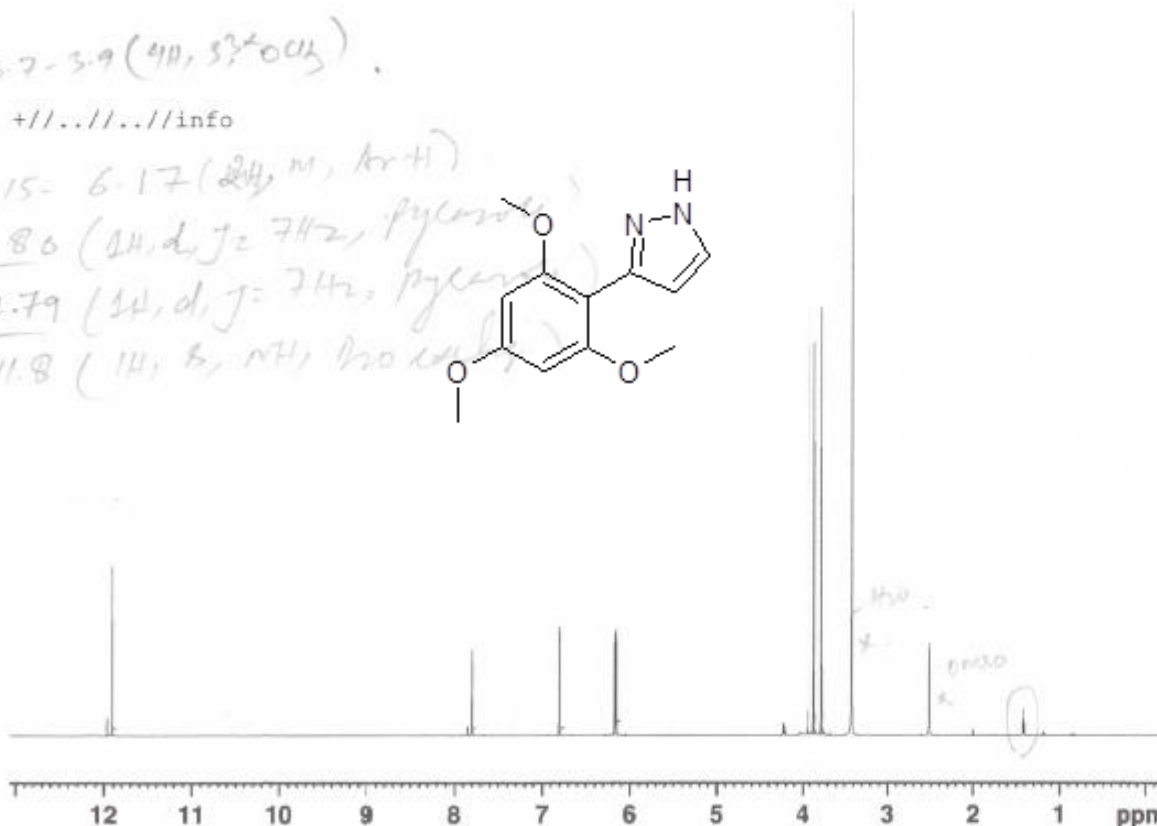

<sup>1</sup>H NMR SPECTRA OF COMPOUND P1

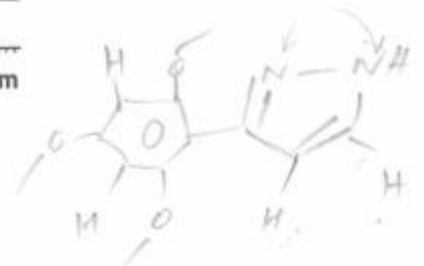

C13CPD DMSO (C:\Bruker\TOPSPIN) abari 25

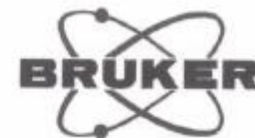

Current Data Parameters  
NAME drMashooq-PD-1a  
EXPNO 11  
PROCNO 1

F2 - Acquisition Parameters  
Date\_ 20181015  
Time 12.49  
INSTRUM spect  
PROBHD 5 mm CPTCI 1H-  
PULPROG zgpg30  
ID 65536  
SOLVENT DMSO  
NS 209  
DS 4  
SWH 41666.668 Hz  
FIDRES 0.635783 Hz  
AQ 0.7864320 sec  
RG 172.3  
DW 12.000 usec  
DE 18.00 usec  
TE 295.0 K  
D1 2.00000000 sec  
D11 0.03000000 sec  
TDO 1

===== CHANNEL f1 =====  
SFO1 176.0754915 MHz  
NUC1 13C  
P1 12.00 usec  
PLW1 121.00000000 W

===== CHANNEL f2 =====  
SFO2 700.1728007 MHz  
NUC2 1H  
CPDPRG2 waltz216  
PCPD2 65.00 usec  
PLW2 9.64999962 W  
PLW12 0.14618000 W  
PLW13 0.06176000 W

F2 - Processing parameters  
S1 32768  
SF 176.0578870 MHz  
WDW EM  
SSB 0  
LB 1.00 Hz  
GB 0  
PC 1.40

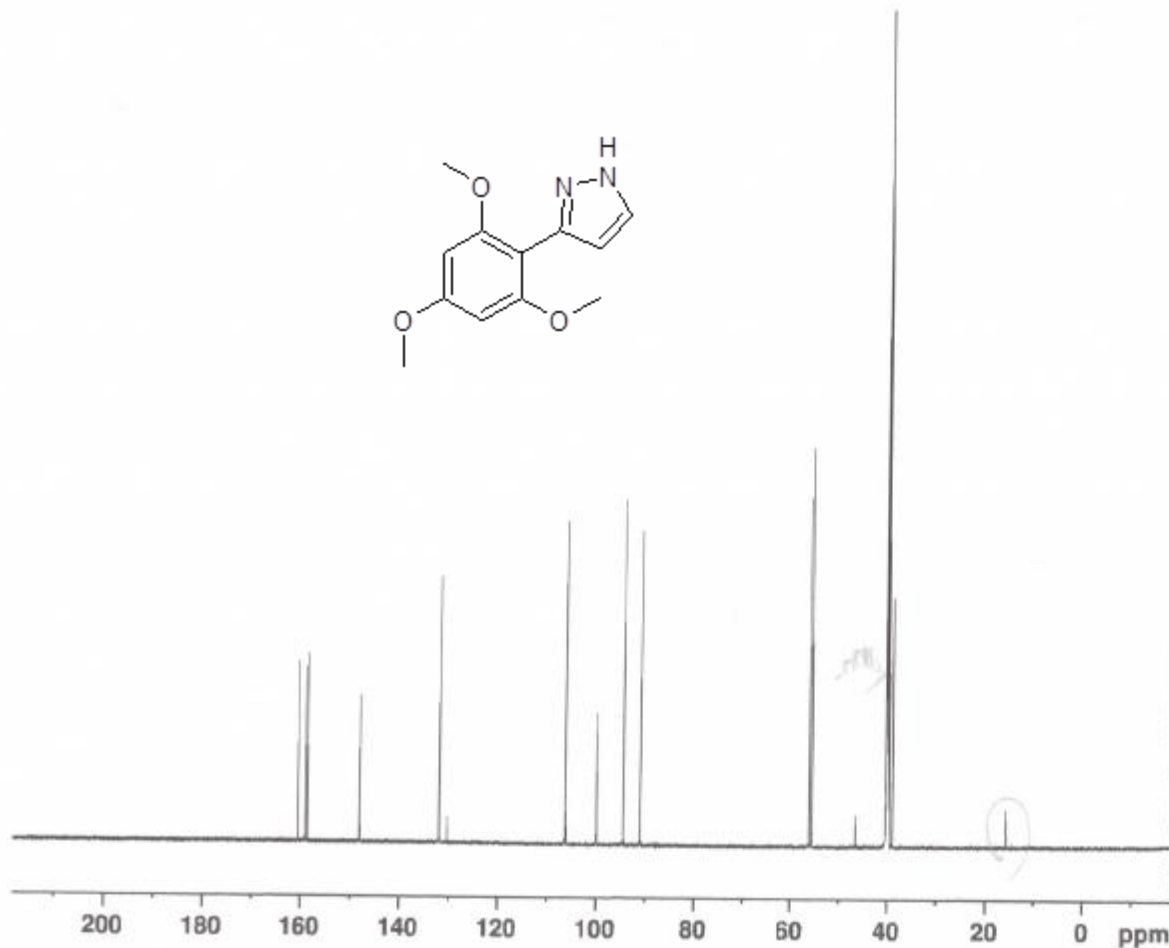

<sup>13</sup>C NMR SPECTRA OF COMPOUND P1

PROTON DMSO (C:\Bruker\TOPSPIN) abari 26

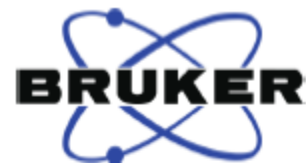

Current Data Parameters  
NAME drMashooq-P-2  
EXPNO 10  
PROCNO 1

F2 - Acquisition Parameters

Date\_ 20180926  
Time 14.50  
INSTRUM spect  
PROBHD 5 mm CPTCI 1H-  
PULPROG zg30  
TD 65536  
SOLVENT DMSO  
NS 16  
DS 2  
SWH 14097.744 Hz  
FIDRES 0.215115 Hz  
AQ 2.3243434 sec  
RG 7.86  
DW 35.467 usec  
DE 31.86 usec  
TE 295.0 K  
D1 1.00000000 sec  
TD0 1

----- CHANNEL f1 -----  
SFO1 700.1743238 MHz  
NUC1 1H  
P1 8.00 usec  
PLW1 9.64999962 W

F2 - Processing parameters  
SI 65536  
SF 700.1700000 MHz  
WDW EM  
SSB 0  
LB 0.30 Hz  
GB 0  
PC 1.00

+//...//...//info

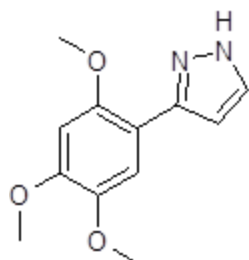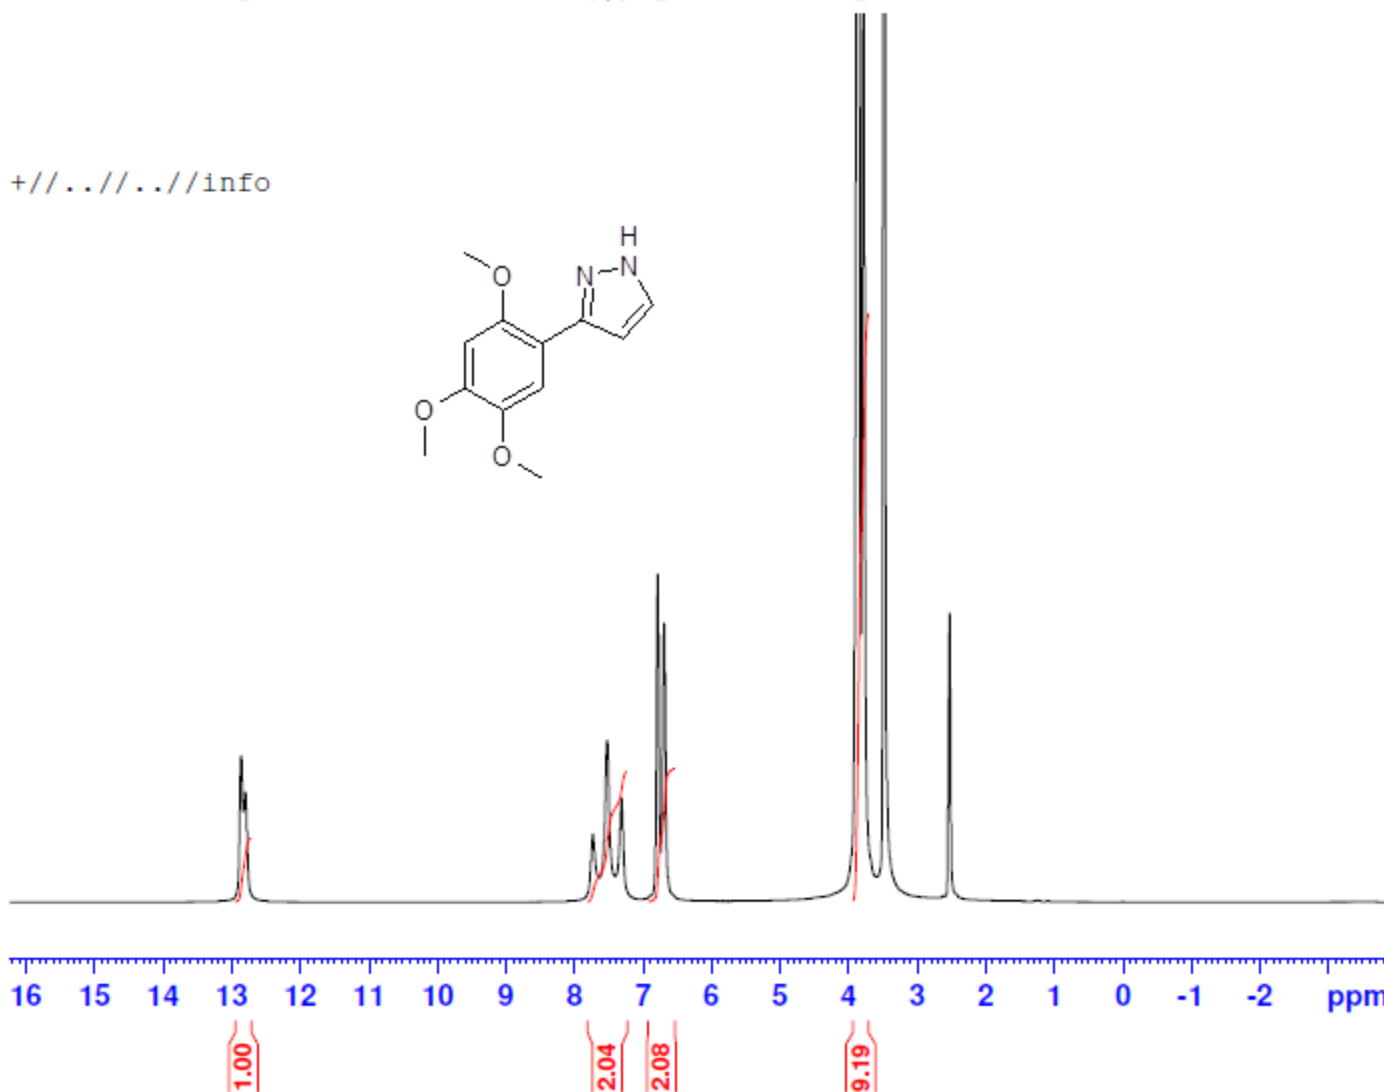

<sup>1</sup>H NMR SPECTRA OF COMPOUND P2

C13CPD DMSO {C:\Bruker\TOPSPIN} abari 26

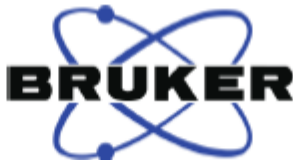

Current Data Parameters  
NAME drMashooq-P-2  
EXPNO 11  
PROCNO 1

F2 - Acquisition Parameters  
Date\_ 20180926  
Time\_ 15.32  
INSTRUM spect  
PROBHD 5 mm CPTCI 1H-  
PULPROG zgpg30  
TD 65536  
SOLVENT DMSO  
NS 839  
DS 4  
SWH 41666.668 Hz  
FIDRES 0.635783 Hz  
AQ 0.7864320 sec  
RG 172.3  
DW 12.000 usec  
DE 18.00 usec  
TE 295.0 K  
D1 2.00000000 sec  
D11 0.03000000 sec  
TD0 1

----- CHANNEL f1 -----  
SFO1 176.0754915 MHz  
NUC1 13C  
P1 12.00 usec  
PLW1 121.00000000 W

----- CHANNEL f2 -----  
SFO2 700.1728007 MHz  
NUC2 1H  
CPDPRG[2] waltz16  
PCPD2 65.00 usec  
PLW2 9.64999962 W  
PLW12 0.14618000 W  
PLW13 0.06176000 W

F2 - Processing parameters  
SI 32768  
SF 176.0578870 MHz  
WDW EM  
SSB 0  
LB 1.00 Hz  
GB 0  
PC 1.40

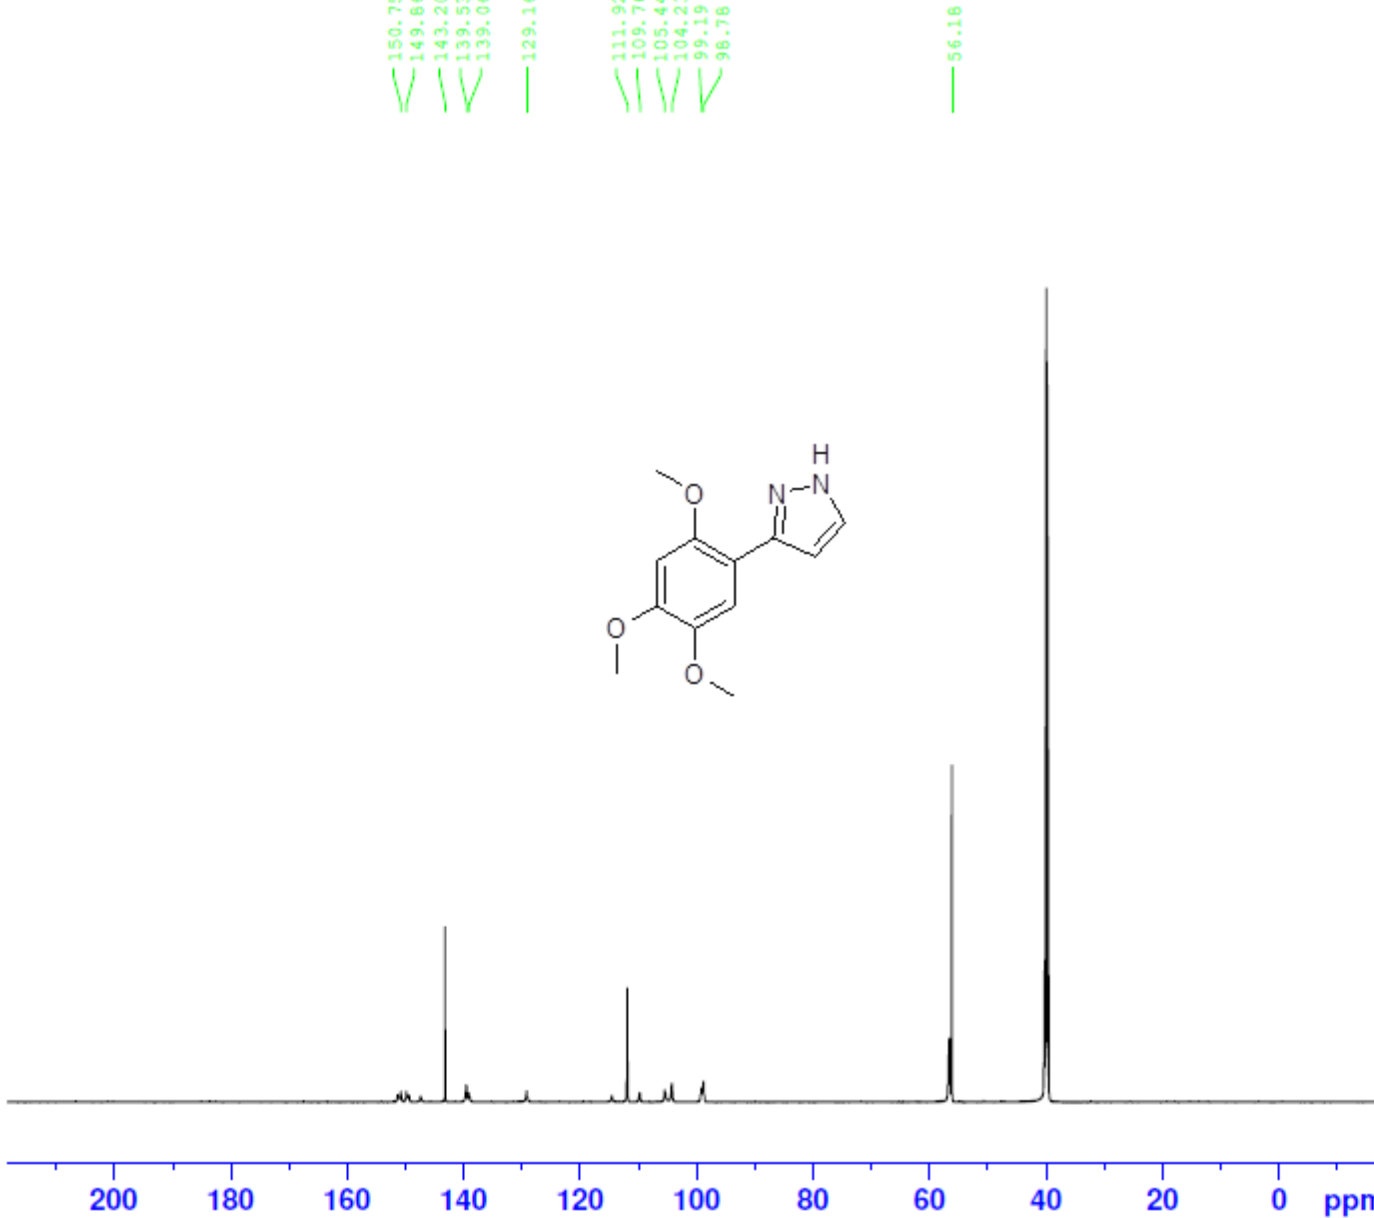

<sup>13</sup>C NMR SPECTRA OF COMPOUND P2

PROTON DMSO (C:\Bruker\TOPSPIN) abari 27

13.12  
12.76

7.75  
7.40  
7.34  
7.31  
6.96  
6.64

3.82  
3.76

+//...//...//info

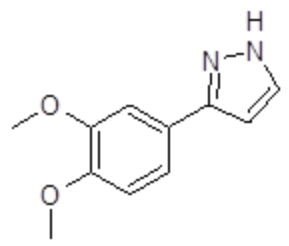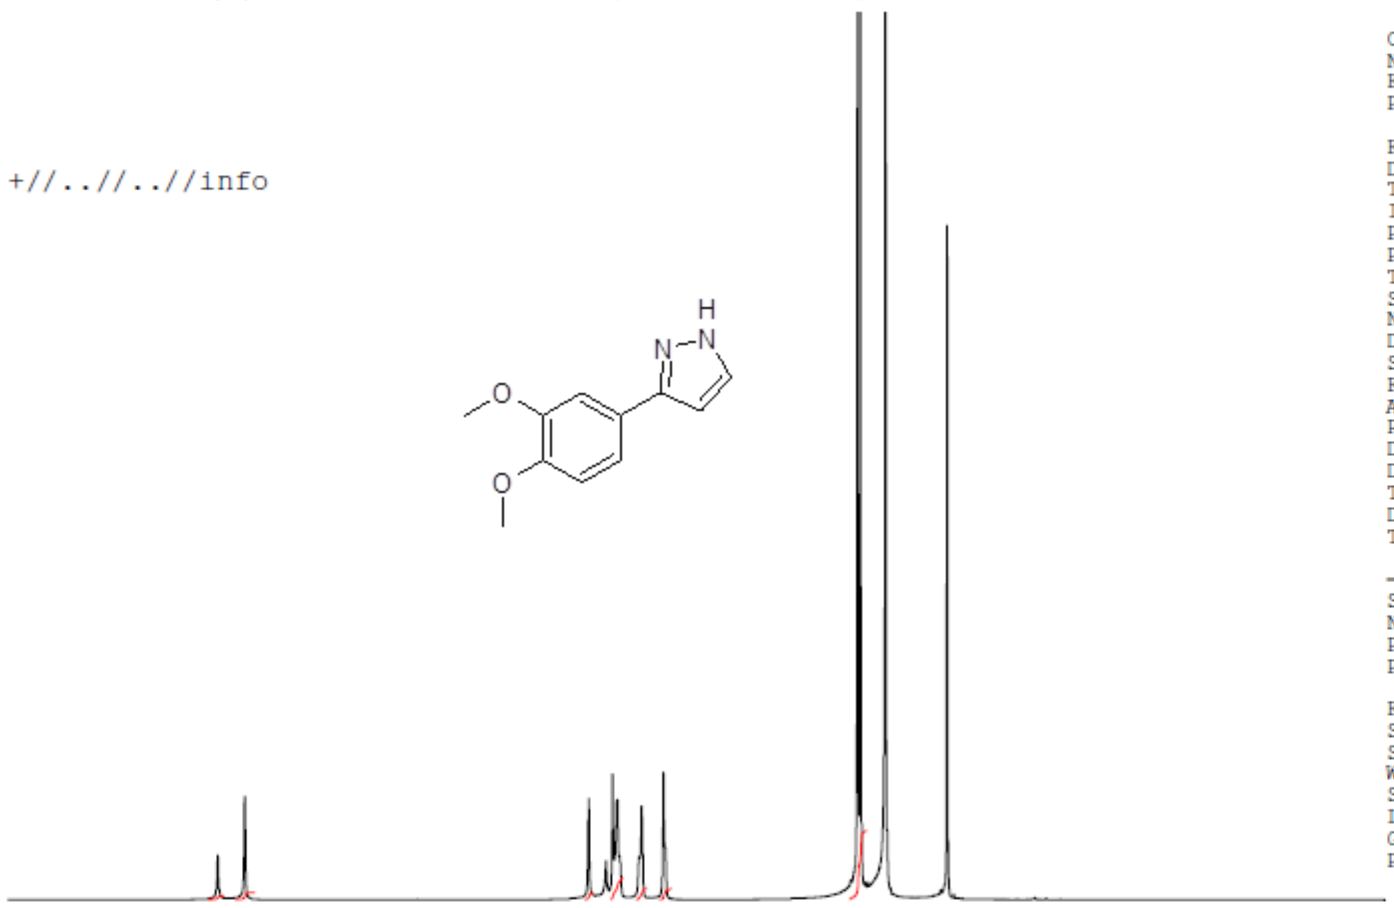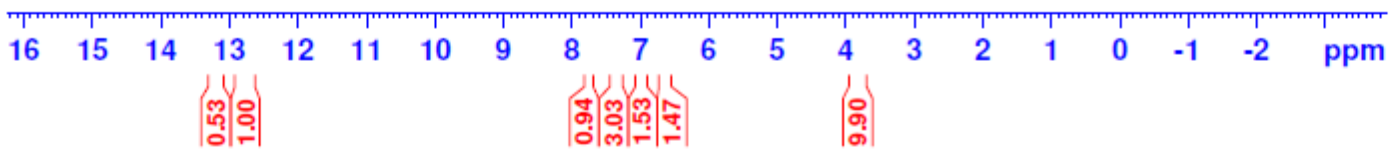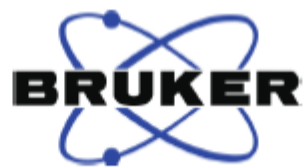

Current Data Parameters  
NAME drMashooq-P-3  
EXPNO 10  
PROCNO 1

F2 - Acquisition Parameters  
Date\_ 20180926  
Time 15.37  
INSTRUM spect  
PROBHD 5 mm CPTCI 1H-  
PULPROG zg30  
TD 65536  
SOLVENT DMSO  
NS 16  
DS 2  
SWH 14097.744 Hz  
FIDRES 0.215115 Hz  
AQ 2.3243434 sec  
RG 14.16  
DW 35.467 usec  
DE 31.86 usec  
TE 295.0 K  
D1 1.00000000 sec  
TD0 1

----- CHANNEL f1 -----  
SFO1 700.1743238 MHz  
NUC1 1H  
P1 8.00 usec  
PLW1 9.64999962 W

F2 - Processing parameters  
SI 65536  
SF 700.1700000 MHz  
WDW EM  
SSB 0  
LB 0.30 Hz  
GB 0  
PC 1.00

<sup>1</sup>H NMR SPECTRA OF COMPOUND P3

C13CPD DMSO {C:\Bruker\TOPSPIN} abari 27

150.57  
149.21  
148.69  
140.40  
130.18  
127.32  
118.08  
112.33  
109.27  
102.03  
101.86

55.96

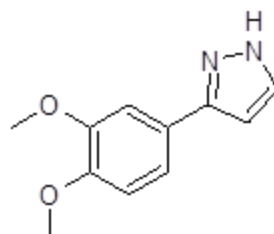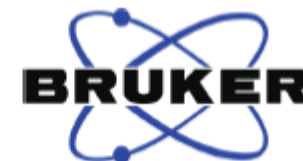

Current Data Parameters  
NAME drMashooq-P-3  
EXPNO 11  
PROCNO 1

F2 - Acquisition Parameters  
Date\_ 20180926  
Time 15.39  
INSTRUM spect  
PROBHD 5 mm CPTCI 1H-  
PULPROG zgpg30  
TD 65536  
SOLVENT DMSO  
NS 1024  
DS 4  
SWH 41666.668 Hz  
FIDRES 0.635783 Hz  
AQ 0.7864320 sec  
RG 172.3  
DW 12.000 usec  
DE 18.00 usec  
TE 295.0 K  
D1 2.00000000 sec  
D11 0.03000000 sec  
TD0 1

----- CHANNEL f1 -----  
SFO1 176.0754915 MHz  
NUC1 13C  
P1 12.00 usec  
PLW1 121.00000000 W

----- CHANNEL f2 -----  
SFO2 700.1728007 MHz  
NUC2 1H  
CPDPRG[2] waltz16  
PCPD2 65.00 usec  
PLW2 9.64999962 W  
PLW12 0.14618000 W  
PLW13 0.06176000 W

F2 - Processing parameters  
SI 32768  
SF 176.0578870 MHz  
WDW EM  
SSB 0  
LB 1.00 Hz  
GB 0  
PC 1.40

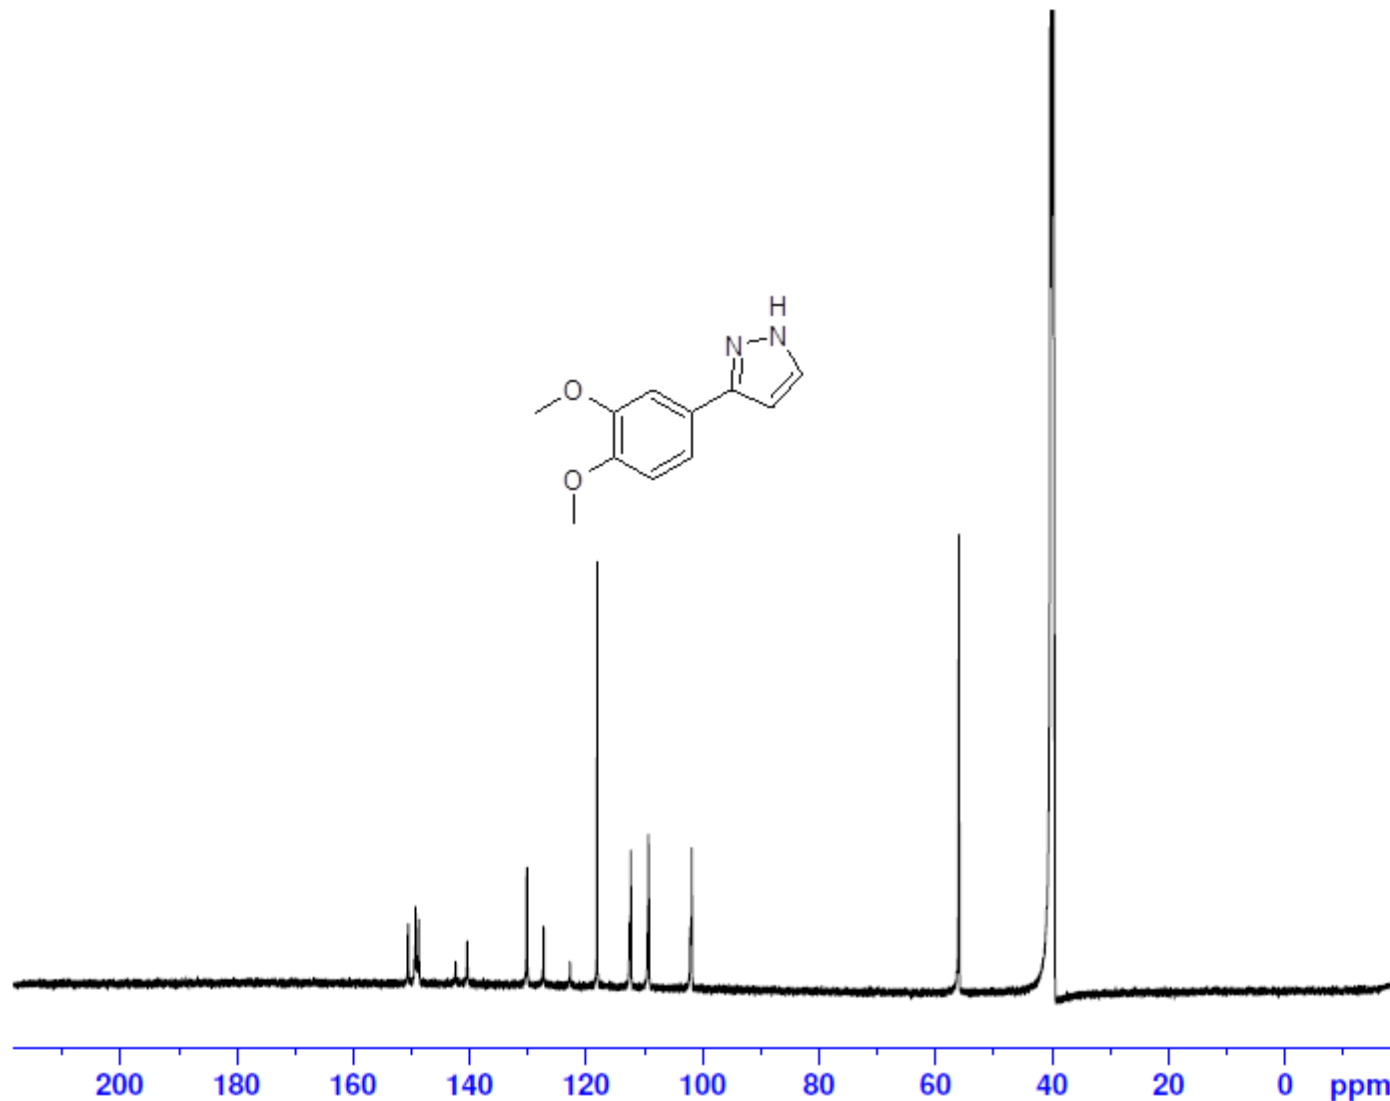

<sup>13</sup>C NMR SPECTRA OF COMPOUND P3

PROTON DMSO {C:\Bruker\TOPSPIN} abari 28

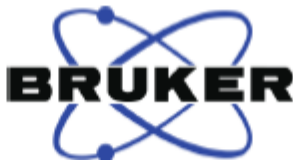

Current Data Parameters  
NAME drMashooq-P-4  
EXPNO 10  
PROCNO 1

F2 - Acquisition Parameters  
Date\_ 20180926  
Time 16.32  
INSTRUM spect  
PROBHD 5 mm CPTCI 1H-  
PULPROG zg30  
TD 65536  
SOLVENT DMSO  
NS 16  
DS 2  
SWH 14097.744 Hz  
FIDRES 0.215115 Hz  
AQ 2.3243434 sec  
RG 12.56  
DW 35.467 usec  
DE 31.86 usec  
TE 295.0 K  
D1 1.00000000 sec  
TD0 1

----- CHANNEL f1 -----  
SFO1 700.1743238 MHz  
NUC1 1H  
P1 8.00 usec  
PLW1 9.64999962 W

F2 - Processing parameters  
SI 65536  
SF 700.1700000 MHz  
WDW EM  
SSB 0  
LB 0.30 Hz  
GB 0  
PC 1.00

+//...//...//info

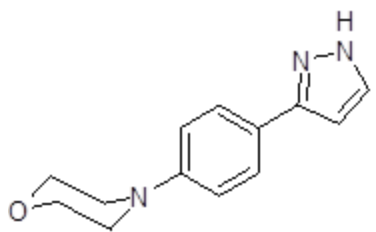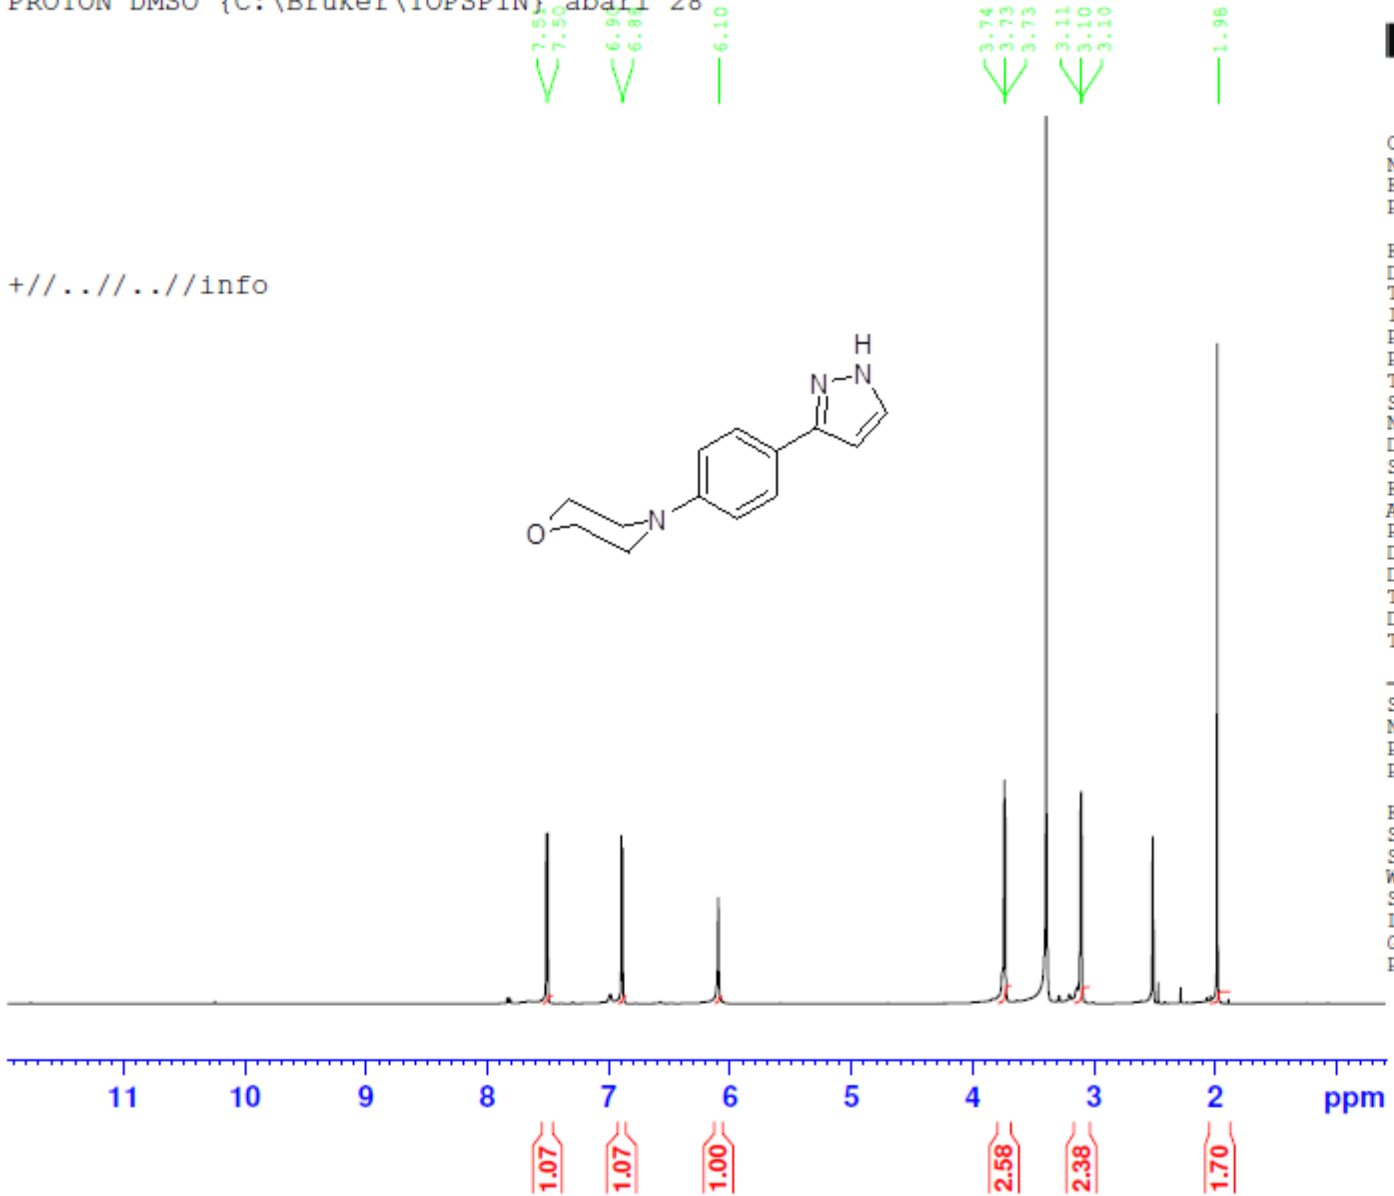

<sup>1</sup>H NMR SPECTRA OF COMPOUND P4

C13CPD DMSO {C:\Bruker\TOPSPIN} abari 28

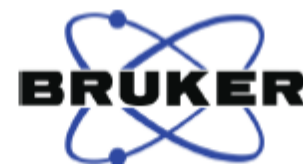

Current Data Parameters  
NAME drMashooq-P-4  
EXPNO 11  
PROCNO 1

F2 - Acquisition Parameters  
Date\_ 20180926  
Time 17.22  
INSTRUM spect  
PROBHD 5 mm CPTCI 1H-  
PULPROG zgpg30  
TD 65536  
SOLVENT DMSO  
NS 1024  
DS 4  
SWH 41666.668 Hz  
FIDRES 0.635783 Hz  
AQ 0.7864320 sec  
RG 172.3  
DW 12.000 usec  
DE 18.00 usec  
TE 295.0 K  
D1 2.00000000 sec  
D11 0.03000000 sec  
TD0 1

----- CHANNEL f1 -----  
SFO1 176.0754915 MHz  
NUC1 13C  
P1 12.00 usec  
PLW1 121.00000000 W

----- CHANNEL f2 -----  
SFO2 700.1728007 MHz  
NUC2 1H  
CPDPRG[2] waltz16  
PCPD2 65.00 usec  
PLW2 9.64999962 W  
PLW12 0.14618000 W  
PLW13 0.06176000 W

F2 - Processing parameters  
SI 32768  
SF 176.0578870 MHz  
WDW EM  
SSB 0  
LB 1.00 Hz  
GB 0  
PC 1.40

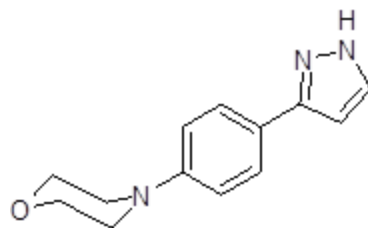

150.62  
143.30  
131.31  
126.03  
114.91  
66.53  
46.69  
11.78

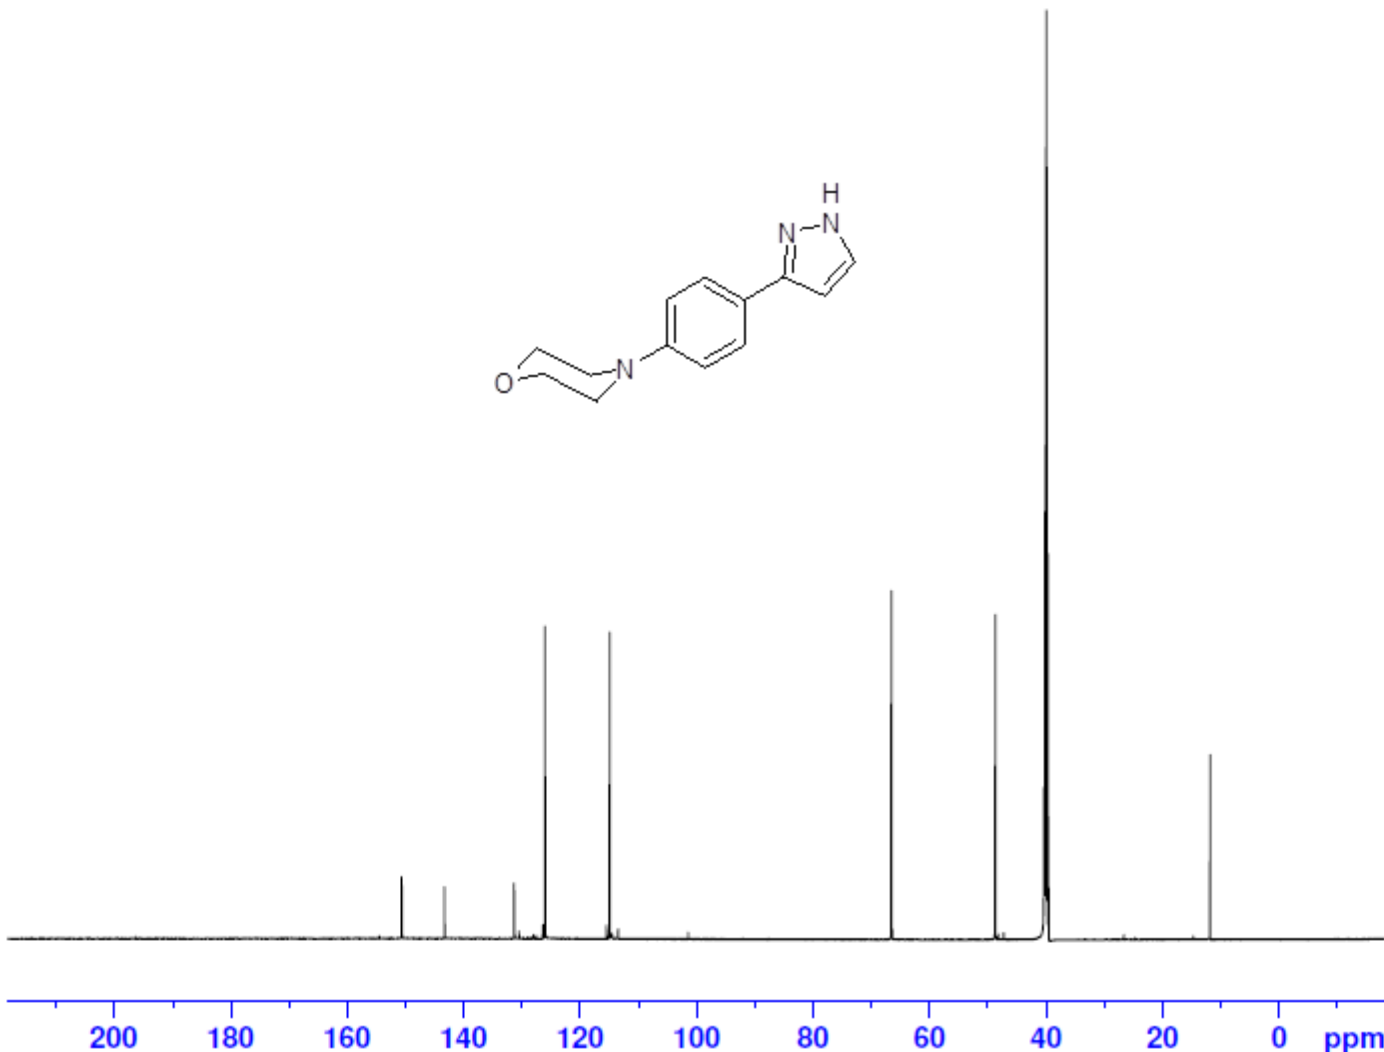

<sup>13</sup>C NMR SPECTRA OF COMPOUND P4



PROTON DMSO (C:\Bruker\TOPSPIN) avari 32

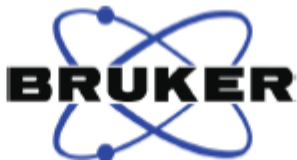

+//...//...//info

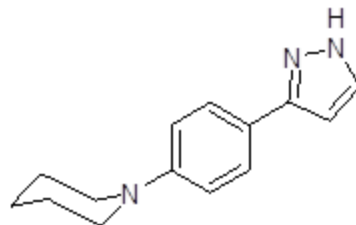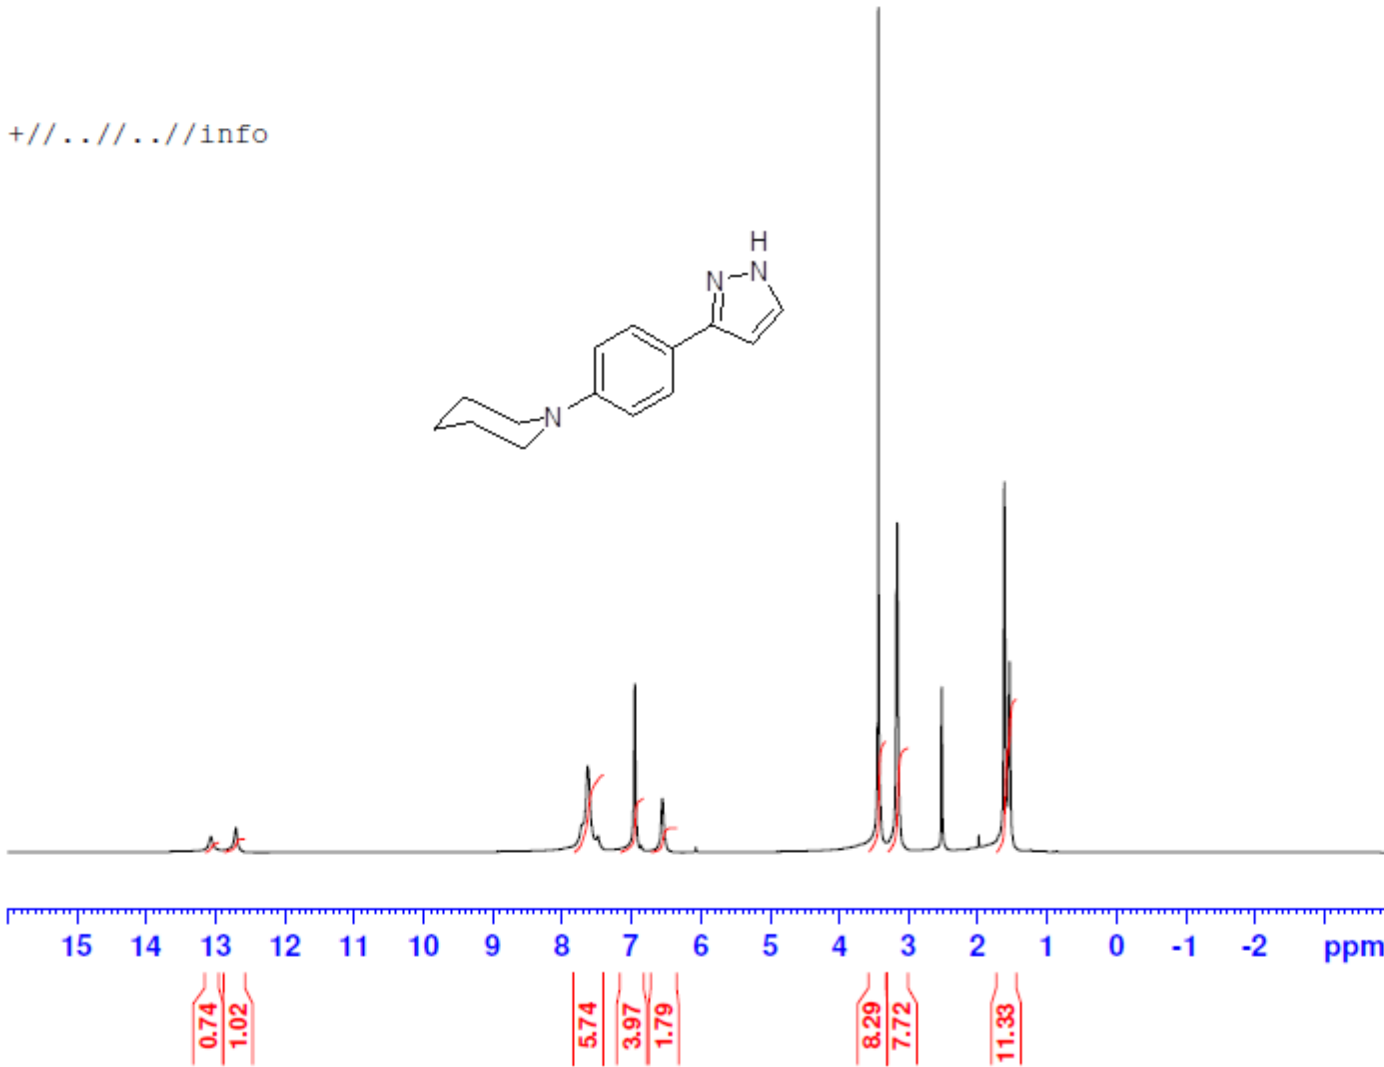

Current Data Parameters  
NAME drMashooq-P-5  
EXPNO 10  
PROCNO 1

F2 - Acquisition Parameters  
Date\_ 20180926  
Time\_ 20.12  
INSTRUM spect  
PROBHD 5 mm CPTCI 1H-  
PULPROG zg30  
TD 65536  
SOLVENT DMSO  
NS 16  
DS 2  
SWH 14097.744 Hz  
FIDRES 0.215115 Hz  
AQ 2.3243434 sec  
RG 11.14  
DW 35.467 usec  
DE 31.86 usec  
TE 295.0 K  
D1 1.00000000 sec  
TD0 1

----- CHANNEL f1 -----  
SFO1 700.1743238 MHz  
NUC1 1H  
P1 8.00 usec  
PLW1 9.64999962 W

F2 - Processing parameters  
SI 65536  
SF 700.1700000 MHz  
WDW EM  
SSB 0  
LB 0.30 Hz  
GB 0  
PC 1.00

<sup>1</sup>H NMR SPECTRA OF COMPOUND P5

C13CPD DMSO {C:\Bruker\TOPSPIN} abari 32



Current Data Parameters  
NAME drMashooq-P-5  
EXPNO 11  
PROCNO 1

F2 - Acquisition Parameters  
Date\_ 20180926  
Time\_ 21.02  
INSTRUM spect  
PROBHD 5 mm CPTCI 1H-  
PULPROG zgpg30  
TD 65536  
SOLVENT DMSO  
NS 1024  
DS 4  
SWH 41666.668 Hz  
FIDRES 0.635783 Hz  
AQ 0.7864320 sec  
RG 172.3  
DW 12.000 usec  
DE 18.00 usec  
TE 295.0 K  
D1 2.00000000 sec  
D11 0.03000000 sec  
TD0 1

----- CHANNEL f1 -----  
SFO1 176.0754915 MHz  
NUC1 13C  
P1 12.00 usec  
PLW1 121.00000000 W

----- CHANNEL f2 -----  
SFO2 700.1728007 MHz  
NUC2 1H  
CPDPRG[2] waltz16  
PCPD2 65.00 usec  
PLW2 9.64999962 W  
PLW12 0.14618000 W  
PLW13 0.06176000 W

F2 - Processing parameters  
SI 32768  
SF 176.0578870 MHz  
WDW EM  
SSB 0  
LB 1.00 Hz  
GB 0  
PC 1.40

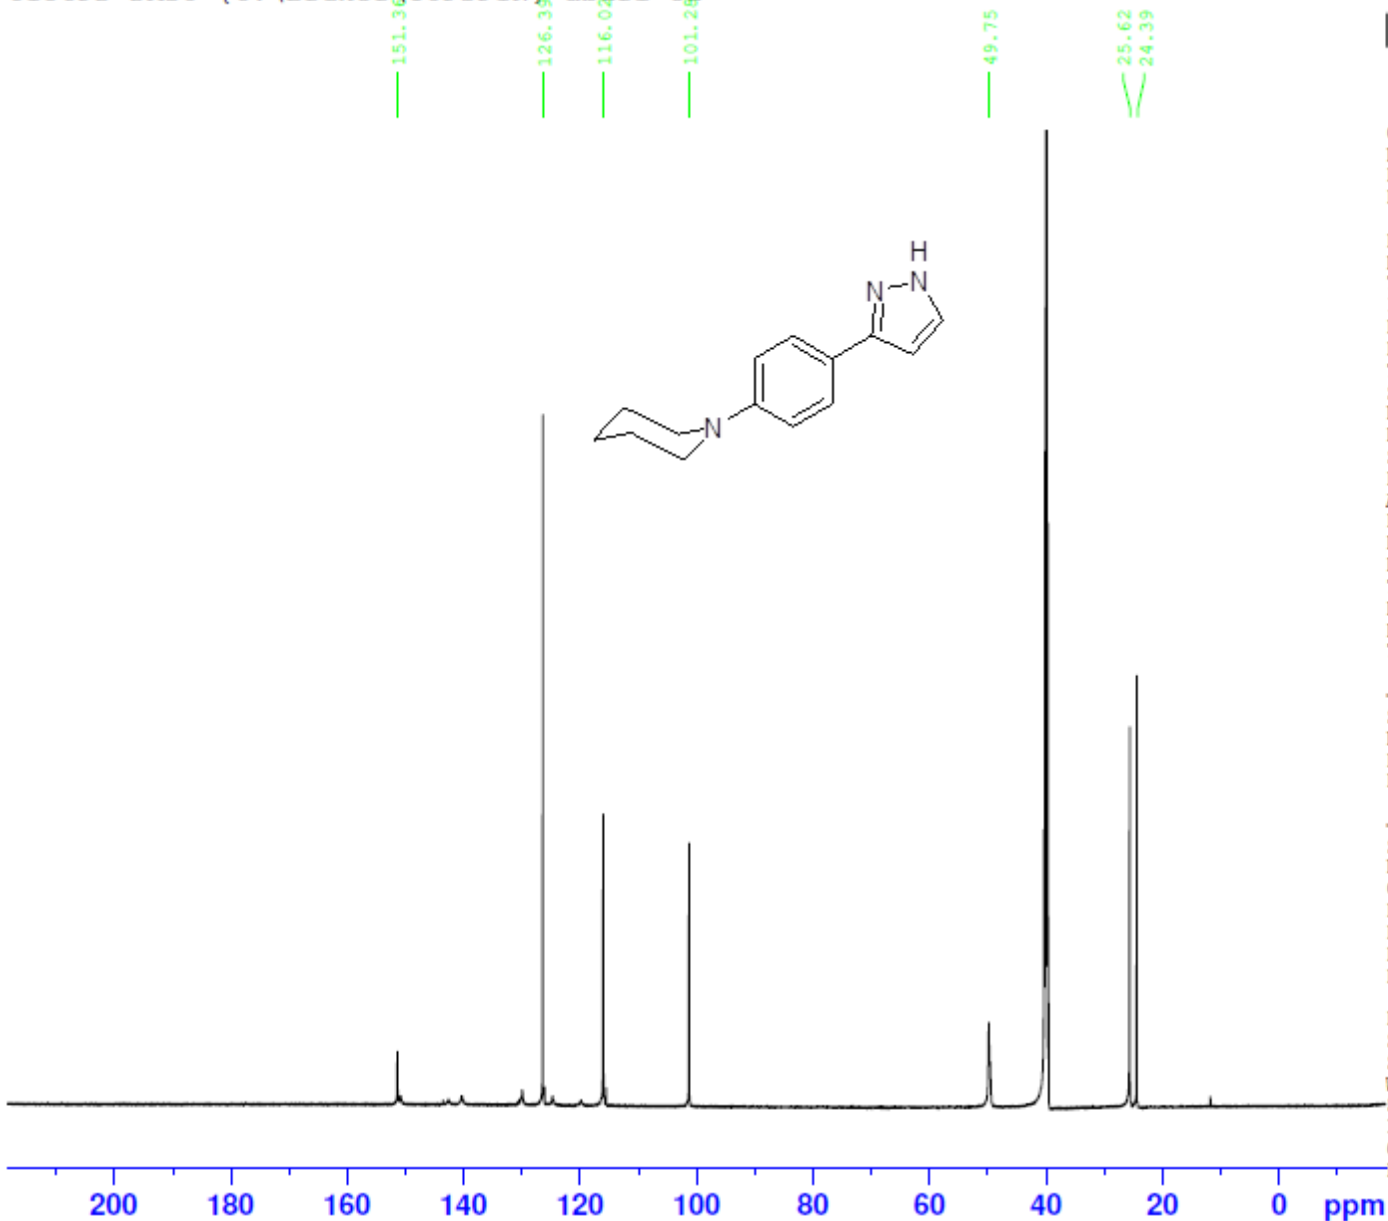

<sup>13</sup> C NMR SPECTRA OF COMPOUND P5

PROTON DMSO {C:\Bruker\TOPSPIN} abari 29

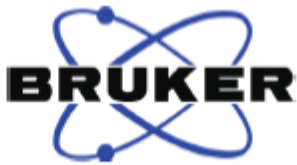

Current Data Parameters  
NAME drMashooq-P-6  
EXPNO 10  
PROCNO 1

F2 - Acquisition Parameters  
Date\_ 20180926  
Time 17.27  
INSTRUM spect  
PROBHD 5 mm CPTCI 1H-  
PULPROG zg30  
TD 65536  
SOLVENT DMSO  
NS 16  
DS 2  
SWH 14097.744 Hz  
FIDRES 0.215115 Hz  
AQ 2.3243434 sec  
RG 10.32  
DW 35.467 usec  
DE 31.86 usec  
TE 295.0 K  
D1 1.00000000 sec  
TD0 1

----- CHANNEL f1 -----  
SFO1 700.1743238 MHz  
NUC1 1H  
P1 8.00 usec  
PLW1 9.64999962 W

F2 - Processing parameters  
SI 65536  
SF 700.1700000 MHz  
WDW EM  
SSB 0  
LB 0.30 Hz  
GB 0  
PC 1.00

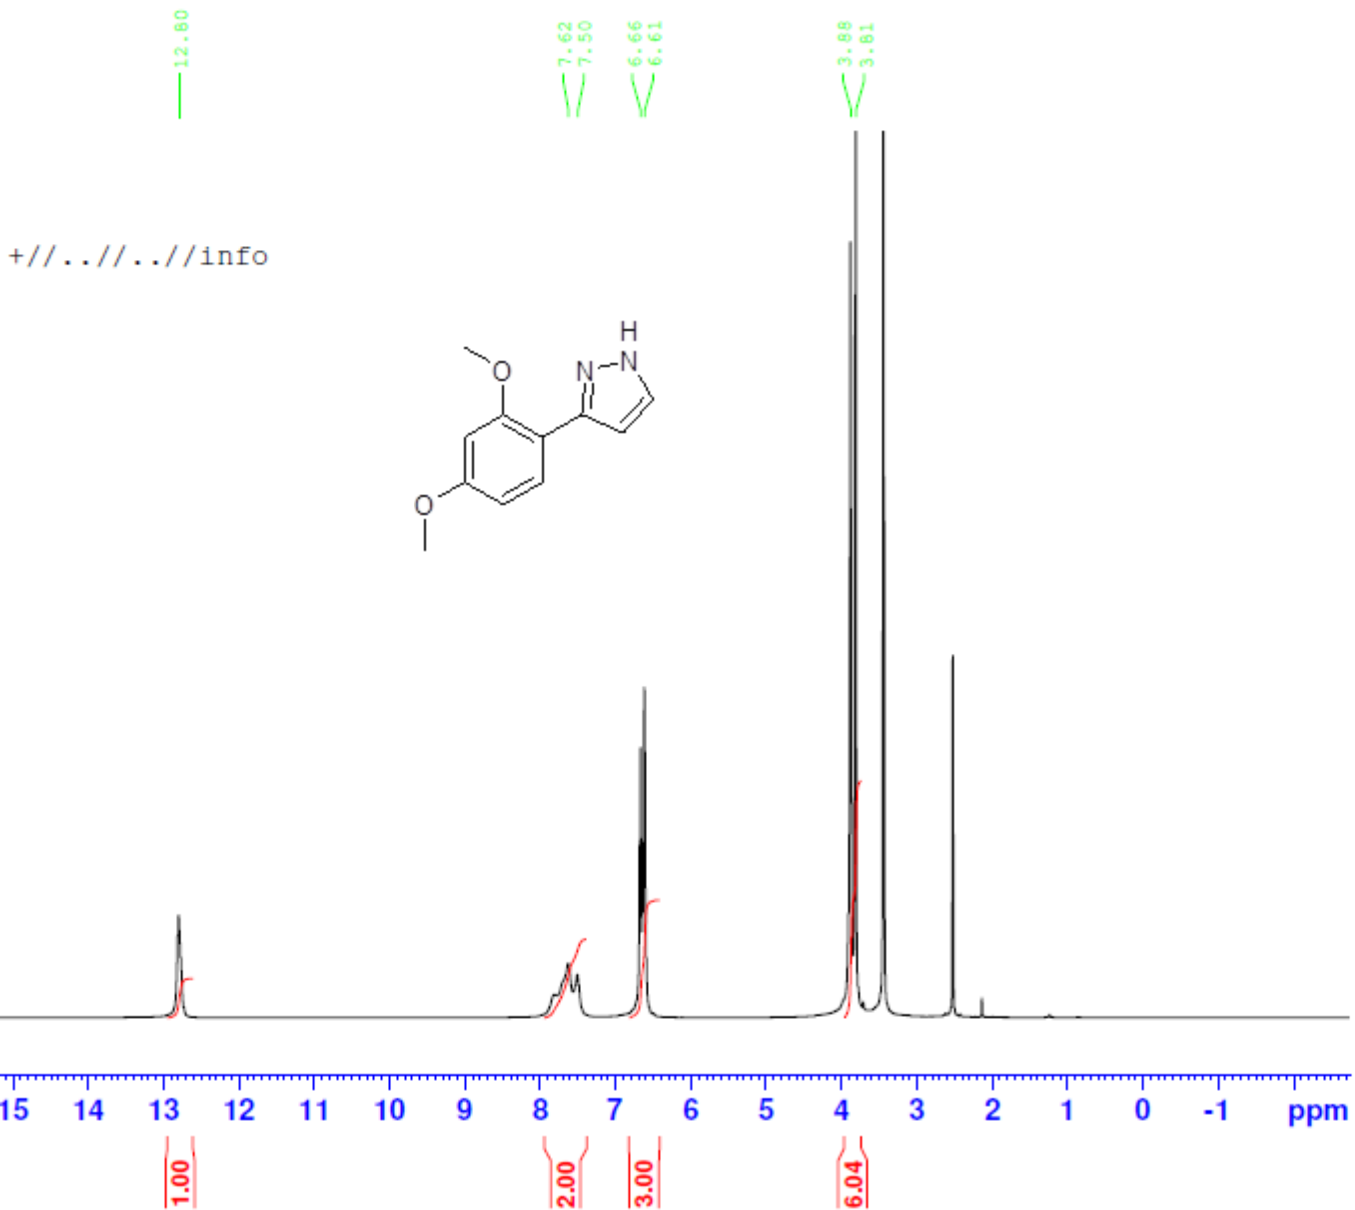

<sup>1</sup>H NMR SPECTRA OF COMPOUND P6

C13CPD DMSO {C:\Bruker\TOPSPIN} abari 29

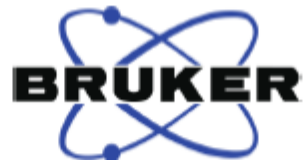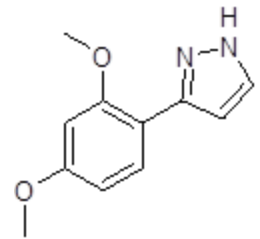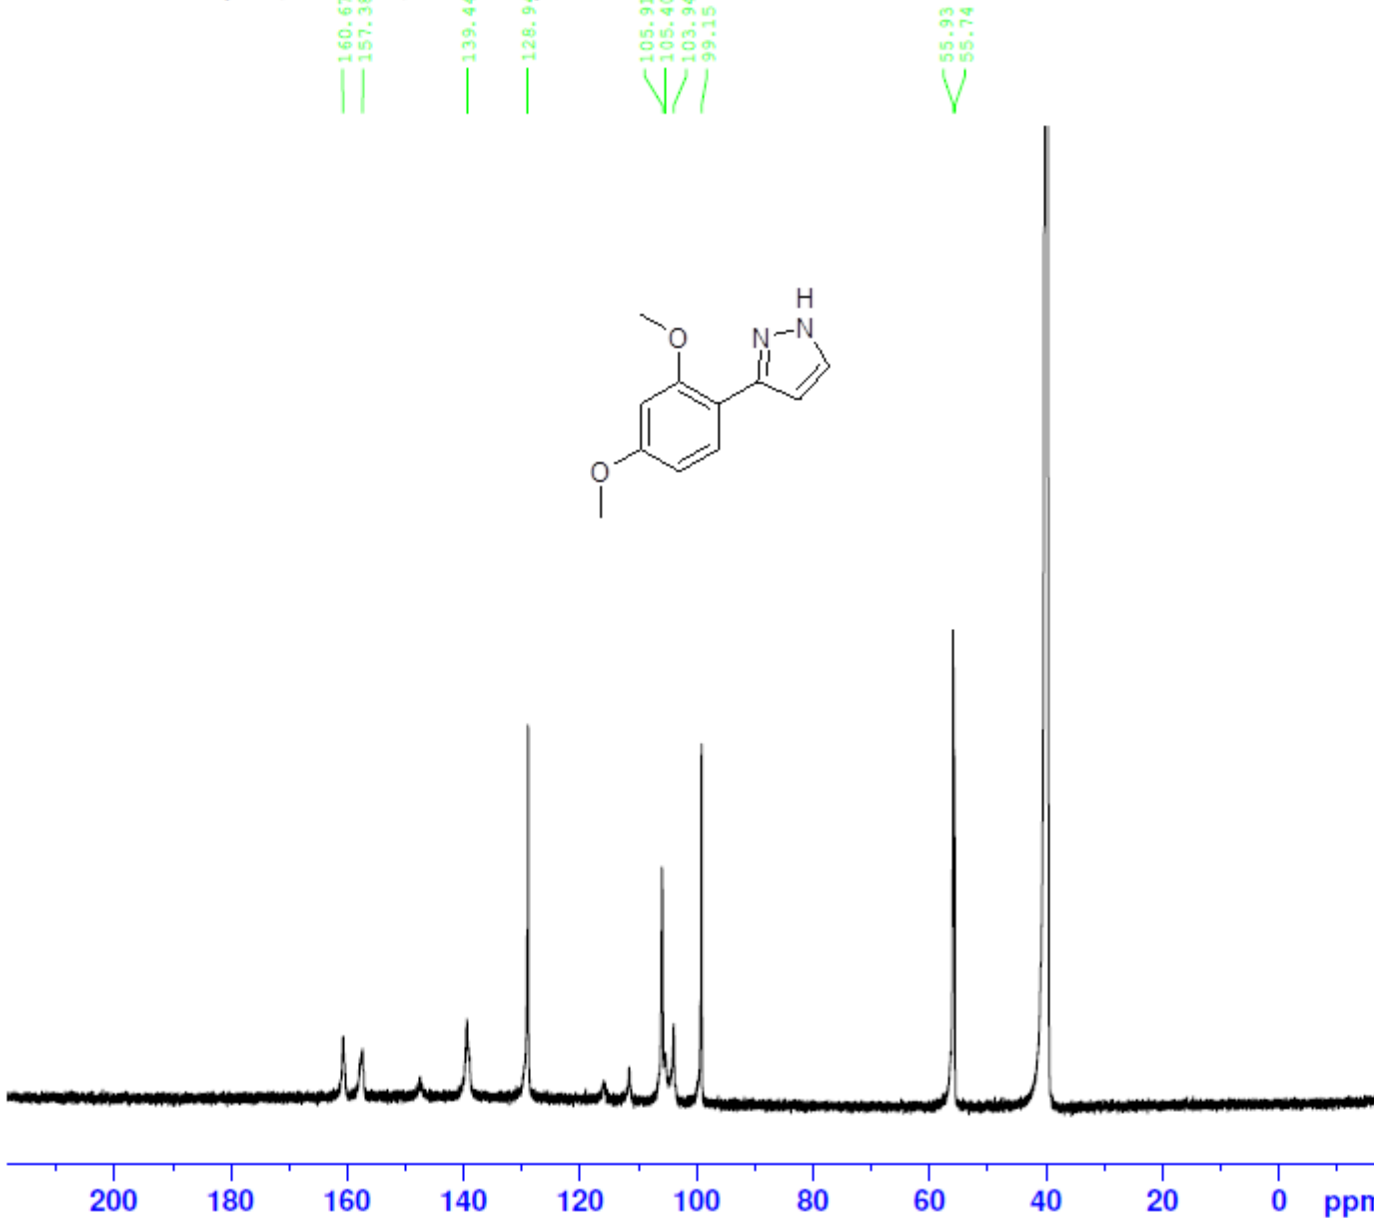

Current Data Parameters  
NAME drMashooq-P-6  
EXPNO 11  
PROCNO 1

F2 - Acquisition Parameters  
Date\_ 20180926  
Time 18.17  
INSTRUM spect  
PROBHD 5 mm CPTCI 1H-  
PULPROG zgpg30  
TD 65536  
SOLVENT DMSO  
NS 1024  
DS 4  
SWH 41666.668 Hz  
FIDRES 0.635783 Hz  
AQ 0.7864320 sec  
RG 172.3  
DW 12.000 usec  
DE 18.00 usec  
TE 295.0 K  
D1 2.00000000 sec  
D11 0.03000000 sec  
TD0 1

----- CHANNEL f1 -----  
SFO1 176.0754915 MHz  
NUC1 13C  
P1 12.00 usec  
PLW1 121.00000000 W

----- CHANNEL f2 -----  
SFO2 700.1728007 MHz  
NUC2 1H  
CPDPRG[2] waltz16  
PCPD2 65.00 usec  
PLW2 9.64999962 W  
PLW12 0.14618000 W  
PLW13 0.06176000 W

F2 - Processing parameters  
SI 32768  
SF 176.0578870 MHz  
WDW EM  
SSB 0  
LB 1.00 Hz  
GB 0  
PC 1.40

<sup>13</sup>C NMR SPECTRA OF COMPOUND P6

PROTON DMSO (C:\Bruker\TOPSPIN) avari 33

13.22  
12.86  
7.76  
7.58  
6.91  
6.63  
3.78  
3.67  
3.50  
2.52  
2.02  
1.21



Current Data Parameters  
NAME drMashooq-P-7  
EXPNO 10  
PROCNO 1

F2 - Acquisition Parameters  
Date\_ 20180926  
Time\_ 21.08  
INSTRUM spect  
PROBHD 5 mm CPTCI 1H-  
PULPROG zg30  
TD 65536  
SOLVENT DMSO  
NS 16  
DS 2  
SWH 14097.744 Hz  
FIDRES 0.215115 Hz  
AQ 2.324343 sec  
RG 12.56  
DW 35.467 usec  
DE 31.86 usec  
TE 295.0 K  
D1 1.00000000 sec  
TD0 1

----- CHANNEL f1 -----  
SFO1 700.1743238 MHz  
NUC1 1H  
P1 8.00 usec  
PLW1 9.64999962 W

F2 - Processing parameters  
SI 65536  
SF 700.1700000 MHz  
WDW EM  
SSB 0  
LB 0.30 Hz  
GB 0  
PC 1.00

+//...//...//info

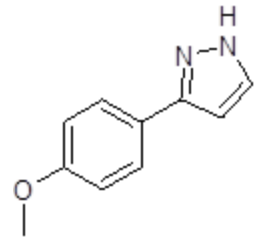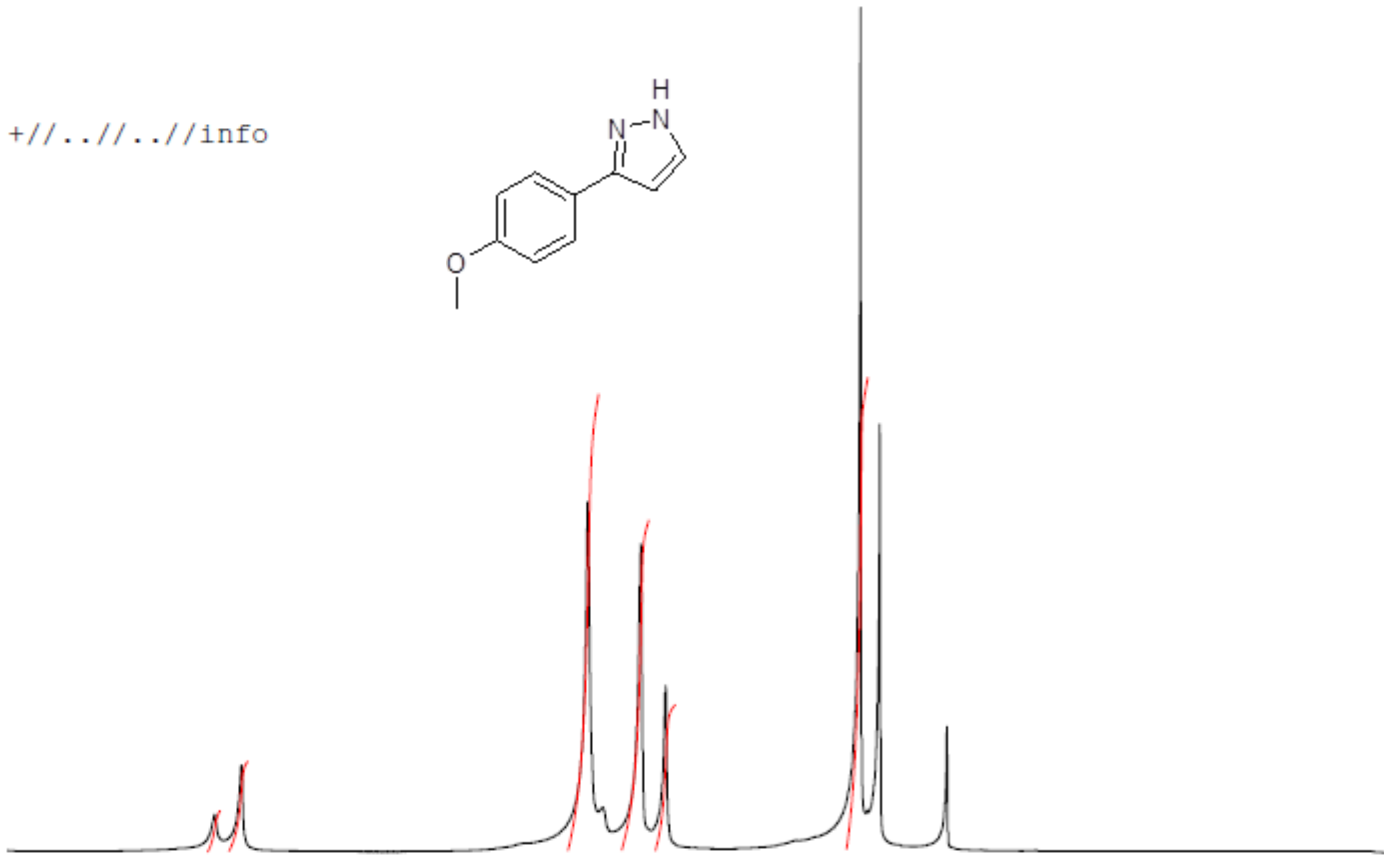

16 15 14 13 12 11 10 9 8 7 6 5 4 3 2 1 0 -1 -2 ppm

0.47  
1.00  
5.05  
3.66  
1.63  
5.24

<sup>1</sup>H NMR SPECTRA OF COMPOUND P7

C13CPD DMSO {C:\Bruker\TOPSPIN} abari 33



Current Data Parameters  
NAME drMashooq-P-7  
EXPNO 11  
PROCNO 1

F2 - Acquisition Parameters  
Date\_ 20180926  
Time 21.58  
INSTRUM spect  
PROBHD 5 mm CPTCI 1H-  
PULPROG zgpg30  
TD 65536  
SOLVENT DMSO  
NS 1024  
DS 4  
SWH 41666.668 Hz  
FIDRES 0.635783 Hz  
AQ 0.7864320 sec  
RG 172.3  
DW 12.000 usec  
DE 18.00 usec  
TE 295.0 K  
D1 2.00000000 sec  
D11 0.03000000 sec  
TDO 1

----- CHANNEL f1 -----  
SFO1 176.0754915 MHz  
NUC1 13C  
P1 12.00 usec  
PLW1 121.00000000 W

----- CHANNEL f2 -----  
SFO2 700.1728007 MHz  
NUC2 1H  
CPDPRG[2] waltz16  
PCPD2 65.00 usec  
PLW2 9.64999962 W  
PLW12 0.14618000 W  
PLW13 0.06176000 W

F2 - Processing parameters  
SI 32768  
SF 176.0578870 MHz  
WDW EM  
SSB 0  
LB 1.00 Hz  
GB 0  
PC 1.40

159.14  
150.47  
142.21  
140.48  
130.16  
126.92  
114.48  
101.72  
55.54

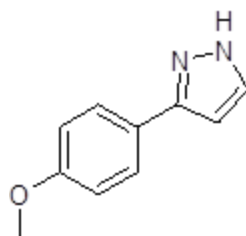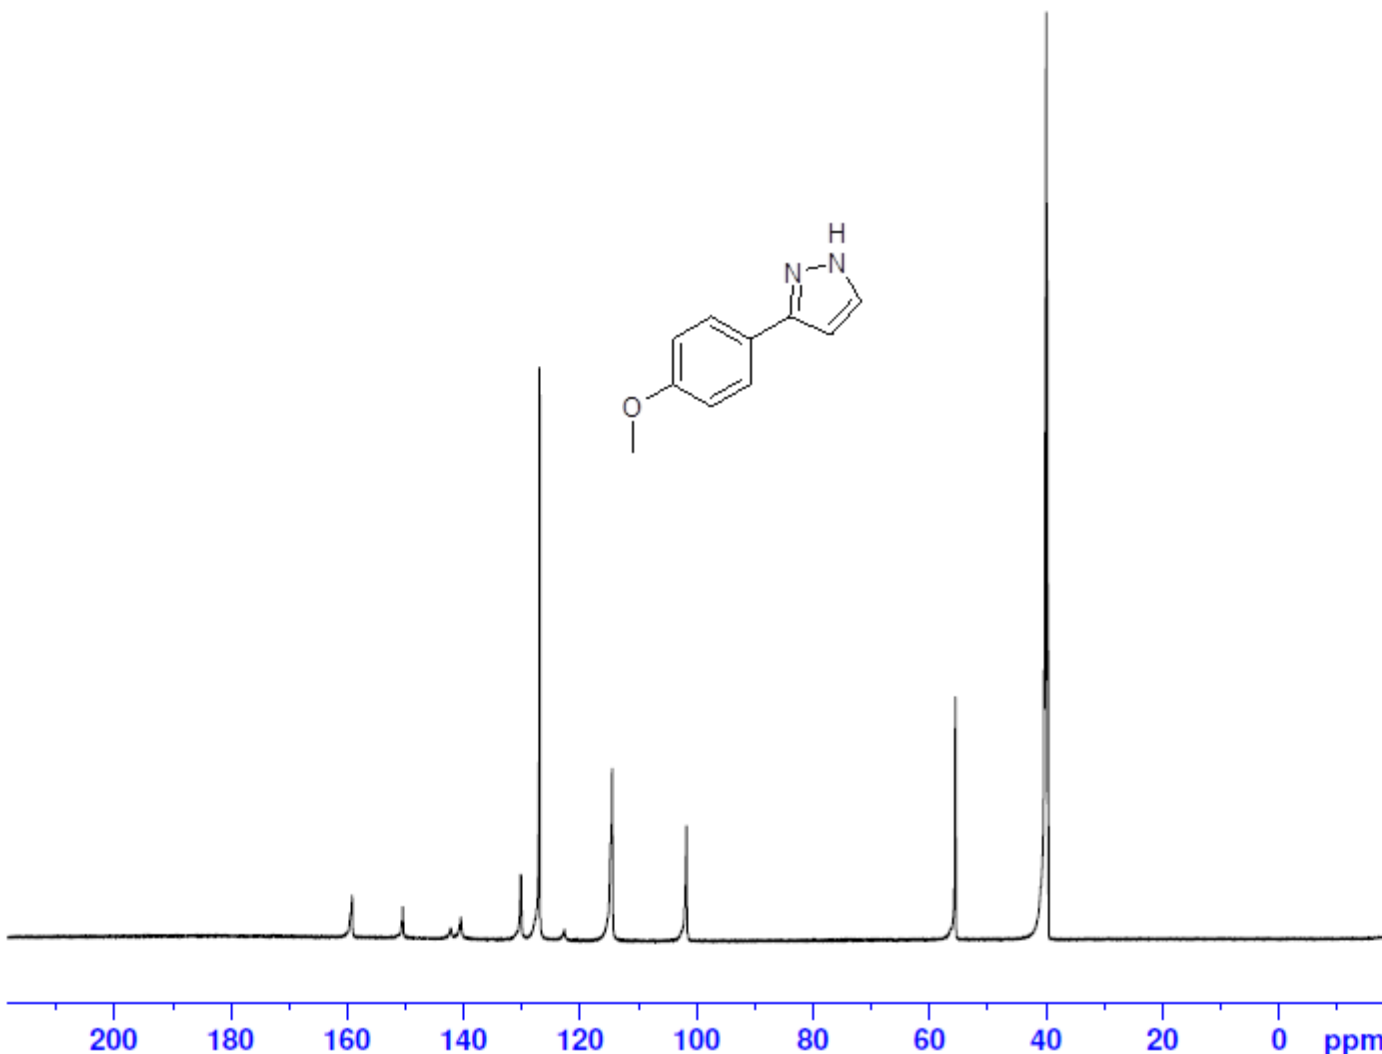

<sup>13</sup>C NMR SPECTRA OF COMPOUND P7

PROTON DMSO {C:\Bruker\TOPSPIN} abari 31

+//...//...//info

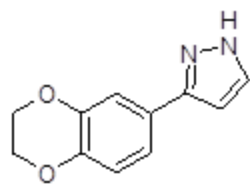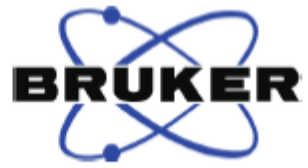

Current Data Parameters  
NAME drMashooq-P-9  
EXPNO 10  
PROCNO 1

F2 - Acquisition Parameters  
Date\_ 20180926  
Time 19.17  
INSTRUM spect  
PROBHD 5 mm CPTCI 1H-  
PULPROG zg30  
TD 65536  
SOLVENT DMSO  
NS 16  
DS 2  
SWH 14097.744 Hz  
FIDRES 0.215115 Hz  
AQ 2.3243434 sec  
RG 10.32  
DW 35.467 usec  
DE 31.86 usec  
TE 295.0 K  
D1 1.00000000 sec  
TD0 1

----- CHANNEL f1 -----  
SFO1 700.1743238 MHz  
NUC1 1H  
P1 8.00 usec  
PLW1 9.64999962 W

F2 - Processing parameters  
SI 65536  
SF 700.1700000 MHz  
WDW EM  
SSB 0  
LB 0.30 Hz  
GB 0  
PC 1.00

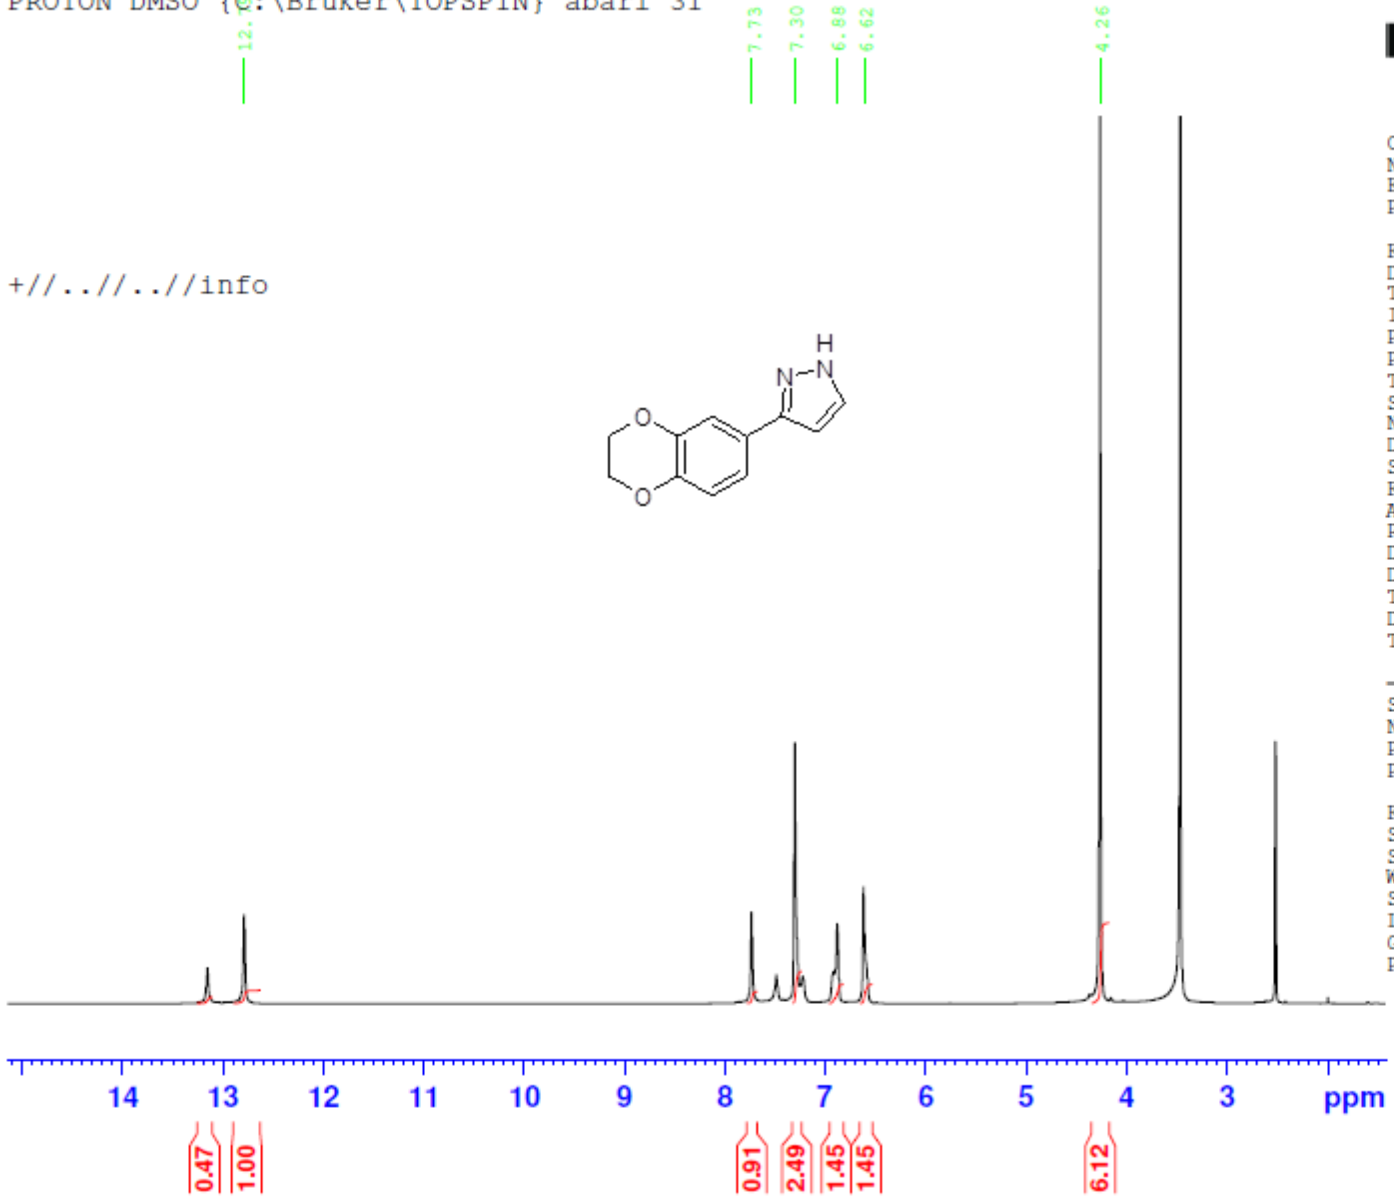

<sup>1</sup>H NMR SPECTRA OF COMPOUND P9

C13CPD DMSO {C:\Bruker\TOPSPIN} abari 31



Current Data Parameters  
NAME drMashooq-P-9  
EXPNO 11  
PROCNO 1

F2 - Acquisition Parameters  
Date\_ 20180926  
Time 20.07  
INSTRUM spect  
PROBHD 5 mm CPTCI 1H-  
PULPROG zgpg30  
TD 65536  
SOLVENT DMSO  
NS 1024  
DS 4  
SWH 41666.668 Hz  
FIDRES 0.635783 Hz  
AQ 0.7864320 sec  
RG 172.3  
DW 12.000 usec  
DE 18.00 usec  
TE 295.0 K  
D1 2.00000000 sec  
D11 0.03000000 sec  
TD0 1

----- CHANNEL f1 -----  
SFO1 176.0754915 MHz  
NUC1 13C  
P1 12.00 usec  
PLW1 121.00000000 W

----- CHANNEL f2 -----  
SFO2 700.1728007 MHz  
NUC2 1H  
CPDPRG[2] waltz16  
PCPD2 65.00 usec  
PLW2 9.64999962 W  
PLW12 0.14618000 W  
PLW13 0.06176000 W

F2 - Processing parameters  
SI 32768  
SF 176.0578870 MHz  
WDW EM  
SSB 0  
LB 1.00 Hz  
GB 0  
PC 1.40

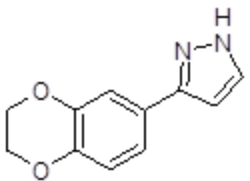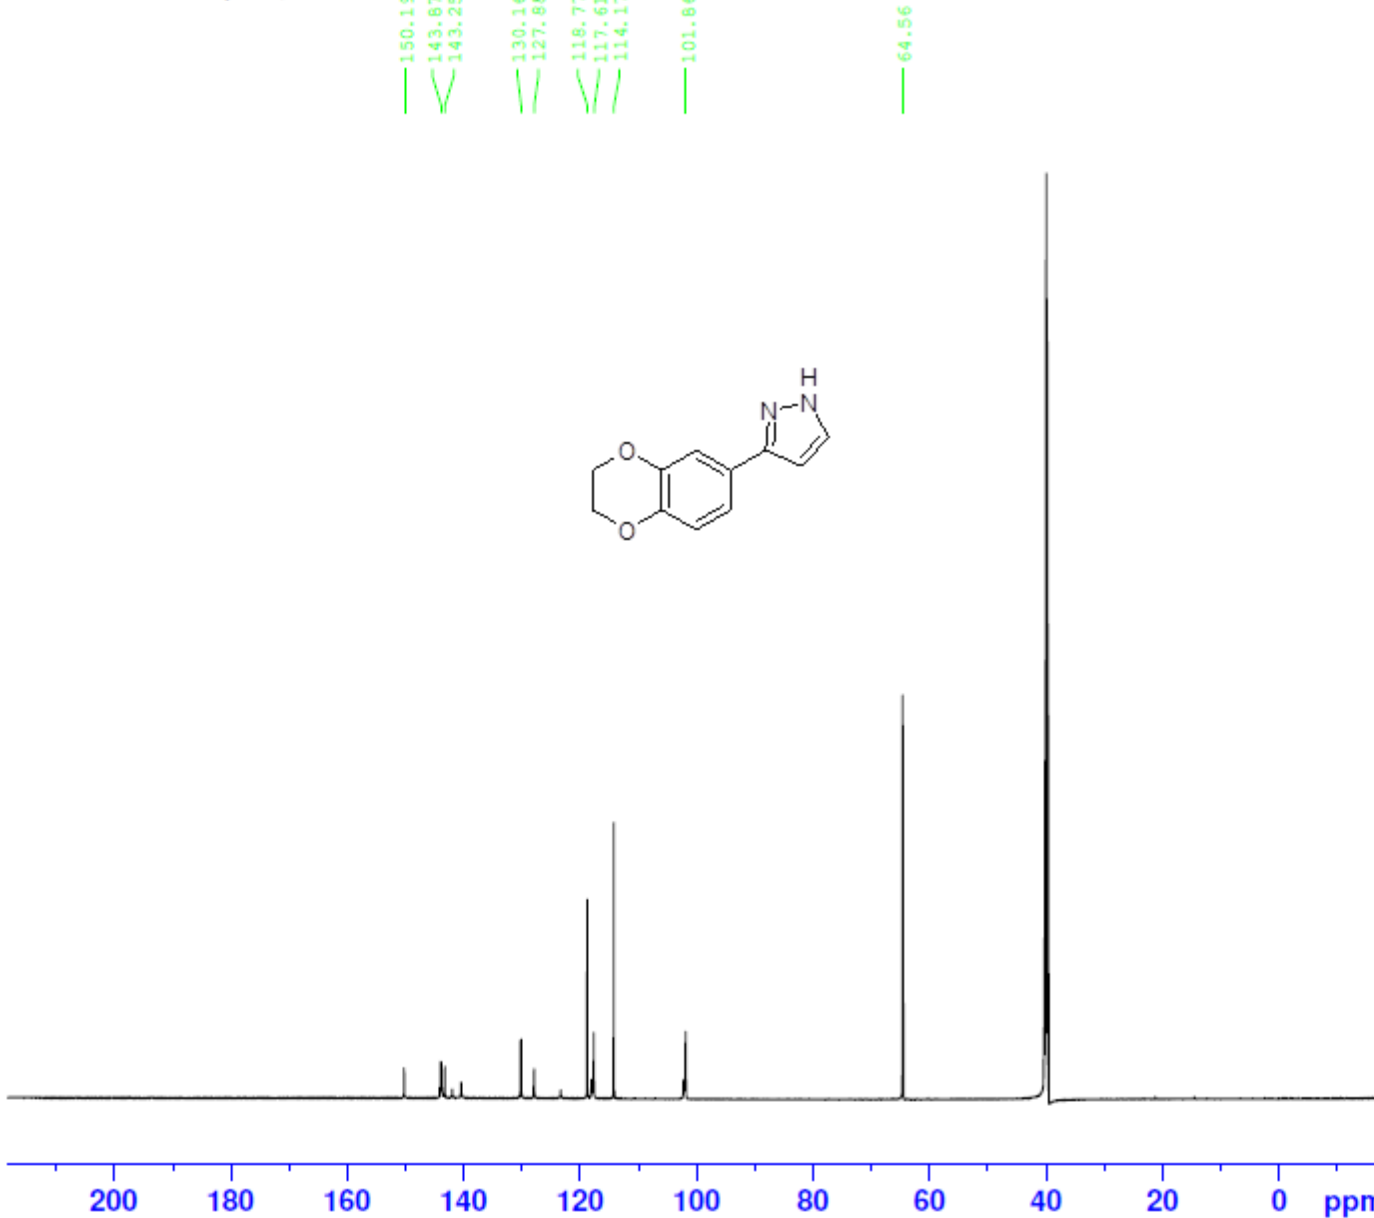

<sup>13</sup>C NMR SPECTRA OF COMPOUND P9



PROTON DMSO (C:\Bruker\TOPSPIN) abari 27



Current Data Parameters  
NAME drMashooq-P-10  
EXPNO 10  
PROCNO 1

F2 - Acquisition Parameters  
Date\_ 20181015  
Time 13.47  
INSTRUM spect  
PROBHD 5 mm CPTCI 1H-  
PULPROG zg30  
TD 65536  
SOLVENT DMSO  
NS 16  
DS 2  
SWH 14097.744 Hz  
FIDRES 0.215115 Hz  
AQ 2.3243434 sec  
RG 12.56  
DW 35.467 usec  
DE 31.86 usec  
TE 295.0 K  
D1 1.00000000 sec  
TD0 1

----- CHANNEL f1 -----  
SFO1 700.1743238 MHz  
NUC1 1H  
P1 8.00 usec  
PLW1 9.64999962 W

F2 - Processing parameters  
SI 65536  
SF 700.1700000 MHz  
WDW EM  
SSB 0  
LB 0.30 Hz  
GB 0  
PC 1.00

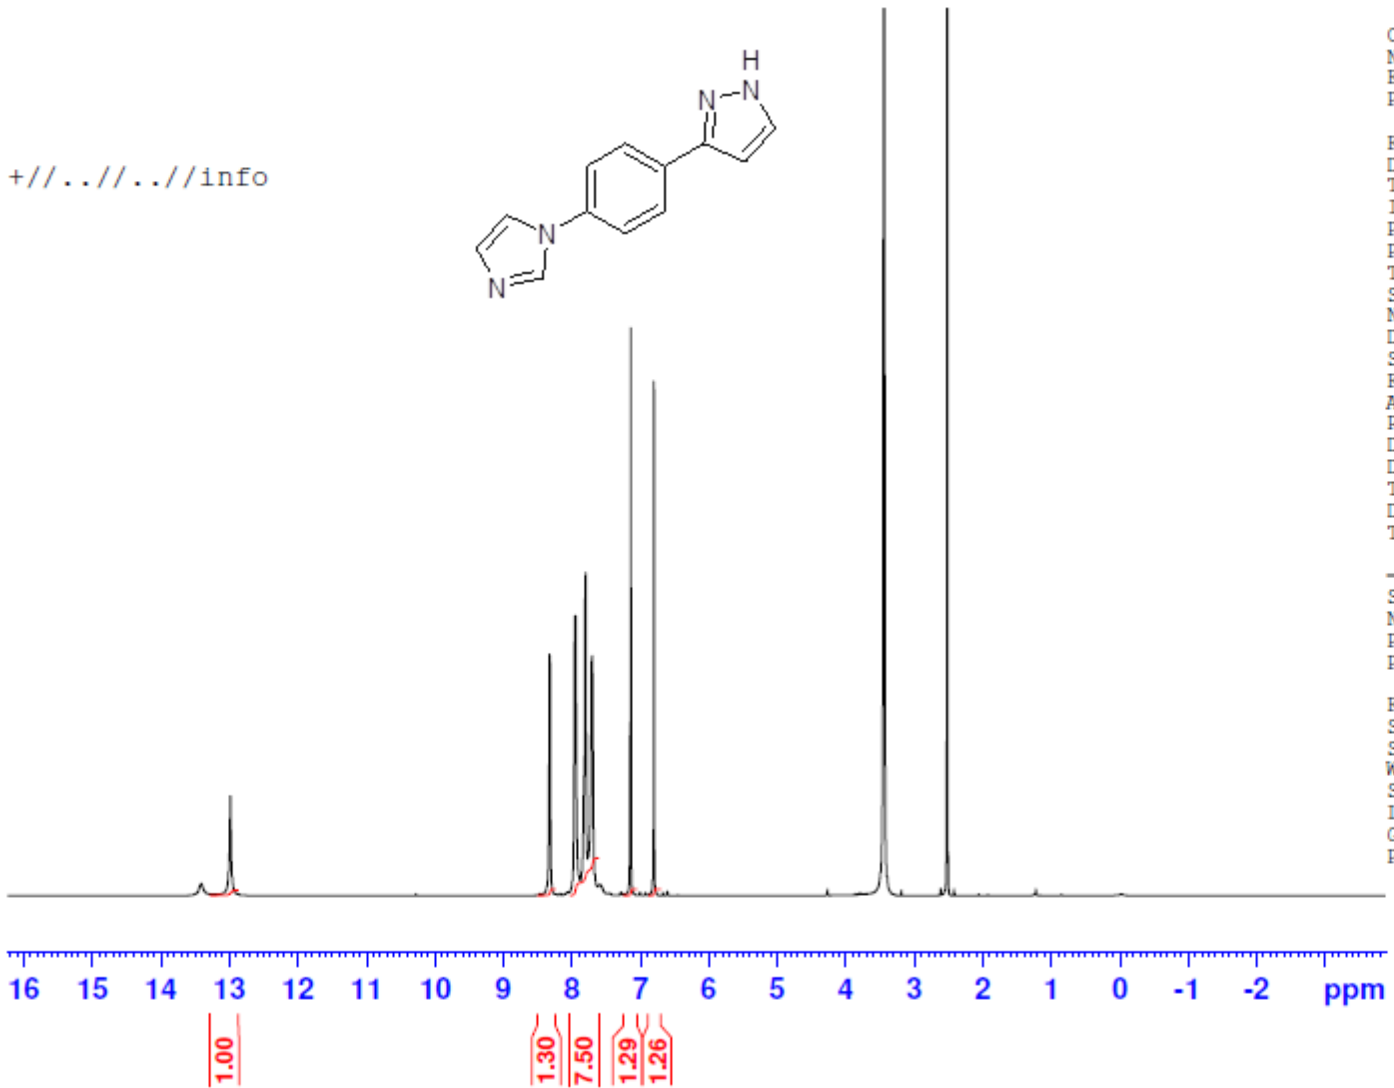

<sup>1</sup>H NMR SPECTRA OF COMPOUND P10

C13CPD DMSO {C:\Bruker\TOPSPIN} abari 27

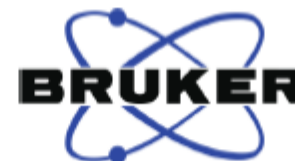

Current Data Parameters  
NAME drMashooq-P-10  
EXPNO 11  
PROCNO 1

F2 - Acquisition Parameters

Date\_ 20181015  
Time 14.38  
INSTRUM spect  
PROBHD 5 mm CPTCI 1H-  
PULPROG zgpg30  
TD 65536  
SOLVENT DMSO  
NS 1024  
DS 4  
SWH 41666.668 Hz  
FIDRES 0.635783 Hz  
AQ 0.7864320 sec  
RG 172.3  
DW 12.000 usec  
DE 18.00 usec  
TE 295.0 K  
D1 2.00000000 sec  
D11 0.03000000 sec  
TD0 1

----- CHANNEL f1 -----

SFO1 176.0754915 MHz  
NUC1 13C  
P1 12.00 usec  
PLW1 121.00000000 W

----- CHANNEL f2 -----

SFO2 700.1728007 MHz  
NUC2 1H  
CPDPRG[2] waltz16  
PCPD2 65.00 usec  
PLW2 9.64999962 W  
PLW12 0.14618000 W  
PLW13 0.06176000 W

F2 - Processing parameters

SI 32768  
SF 176.0578870 MHz  
WDW EM  
SSB 0  
LB 1.00 Hz  
GB 0  
PC 1.40

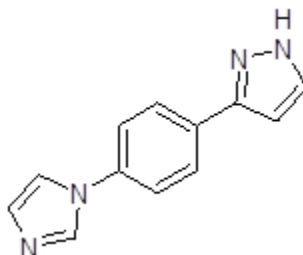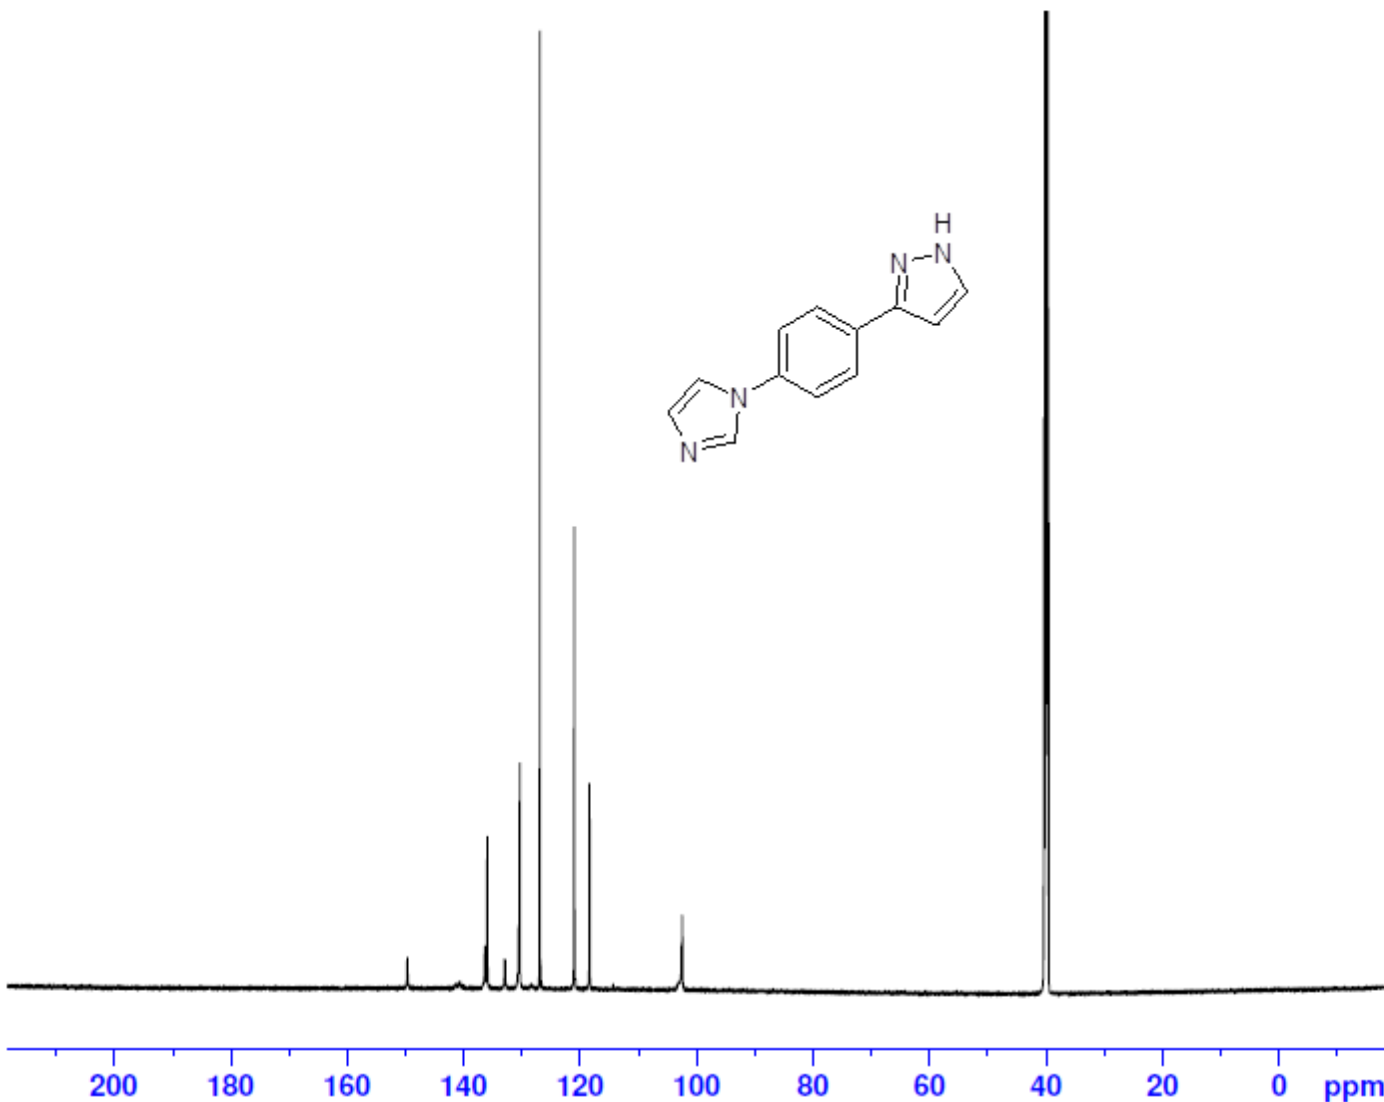

<sup>13</sup>C NMR SPECTRA OF COMPOUND P10

PROTON DMSO (C:\Bruker\TOPSPIN) abari 8



+//...//...//info

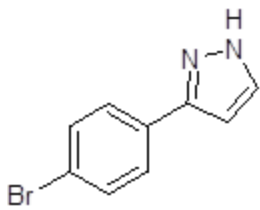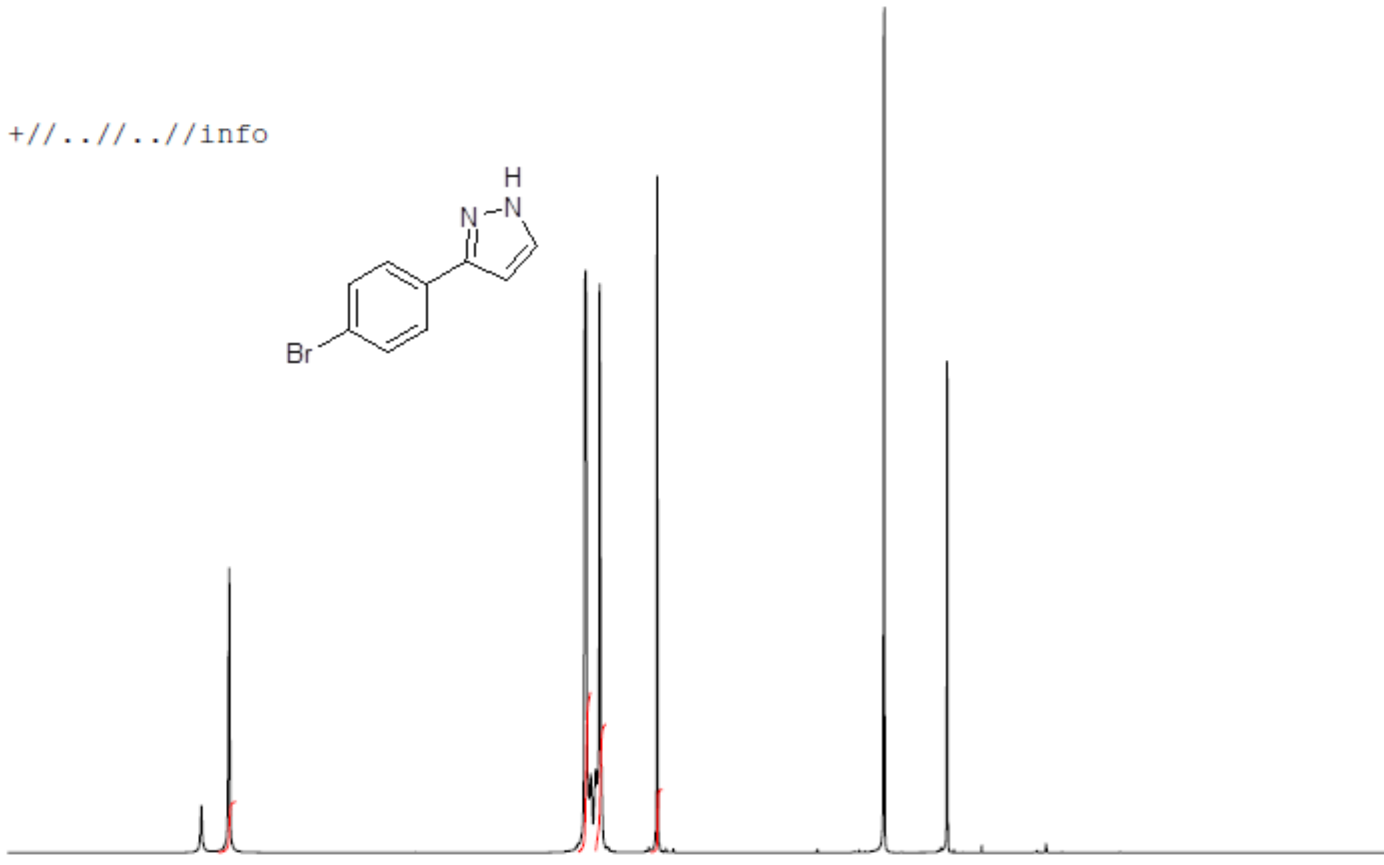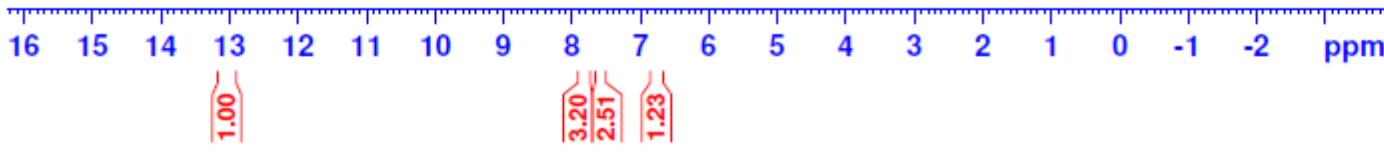

Current Data Parameters  
NAME drMashooq-P11  
EXPNO 10  
PROCNO 1

F2 - Acquisition Parameters  
Date\_ 20181113  
Time 20.40  
INSTRUM spect  
PROBHD 5 mm CPTCI 1H-  
PULPROG zg30  
TD 65536  
SOLVENT DMSO  
NS 16  
DS 2  
SWH 14097.744 Hz  
FIDRES 0.215115 Hz  
AQ 2.3243434 sec  
RG 11.14  
DW 35.467 usec  
DE 31.86 usec  
TE 295.0 K  
D1 1.00000000 sec  
TD0 1

----- CHANNEL f1 -----  
SFO1 700.1743238 MHz  
NUC1 1H  
P1 8.00 usec  
PLW1 9.64999962 W

F2 - Processing parameters  
SI 65536  
SF 700.1700000 MHz  
WDW EM  
SSB 0  
LB 0.30 Hz  
GB 0  
PC 1.00

<sup>1</sup>H NMR SPECTRA OF COMPOUND P11

C13CPD DMSO {C:\Bruker\TOPSPIN} abari 8

149.47  
133.56  
132.56  
131.98  
130.56  
127.60  
120.68  
102.45

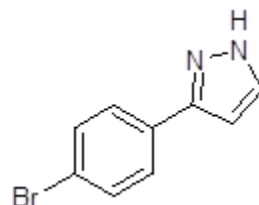

Current Data Parameters  
NAME drMashooq-P11  
EXPNO 11  
PROCNO 1

F2 - Acquisition Parameters  
Date\_ 20181113  
Time\_ 21.30  
INSTRUM spect  
PROBHD 5 mm CPTCI 1H-  
PULPROG zgpg30  
TD 65536  
SOLVENT DMSO  
NS 1024  
DS 4  
SWH 41666.668 Hz  
FIDRES 0.635783 Hz  
AQ 0.7864320 sec  
RG 172.3  
DW 12.000 usec  
DE 18.00 usec  
TE 295.0 K  
D1 2.00000000 sec  
D11 0.03000000 sec  
TD0 1

----- CHANNEL f1 -----  
SFO1 176.0754915 MHz  
NUC1 13C  
P1 12.00 usec  
PLW1 121.00000000 W

----- CHANNEL f2 -----  
SFO2 700.1728007 MHz  
NUC2 1H  
CPDPRG[2] waltz16  
PCPD2 65.00 usec  
PLW2 9.64999962 W  
PLW12 0.14618000 W  
PLW13 0.06176000 W

F2 - Processing parameters  
SI 32768  
SF 176.0578870 MHz  
WDW EM  
SSB 0  
LB 1.00 Hz  
GB 0  
PC 1.40

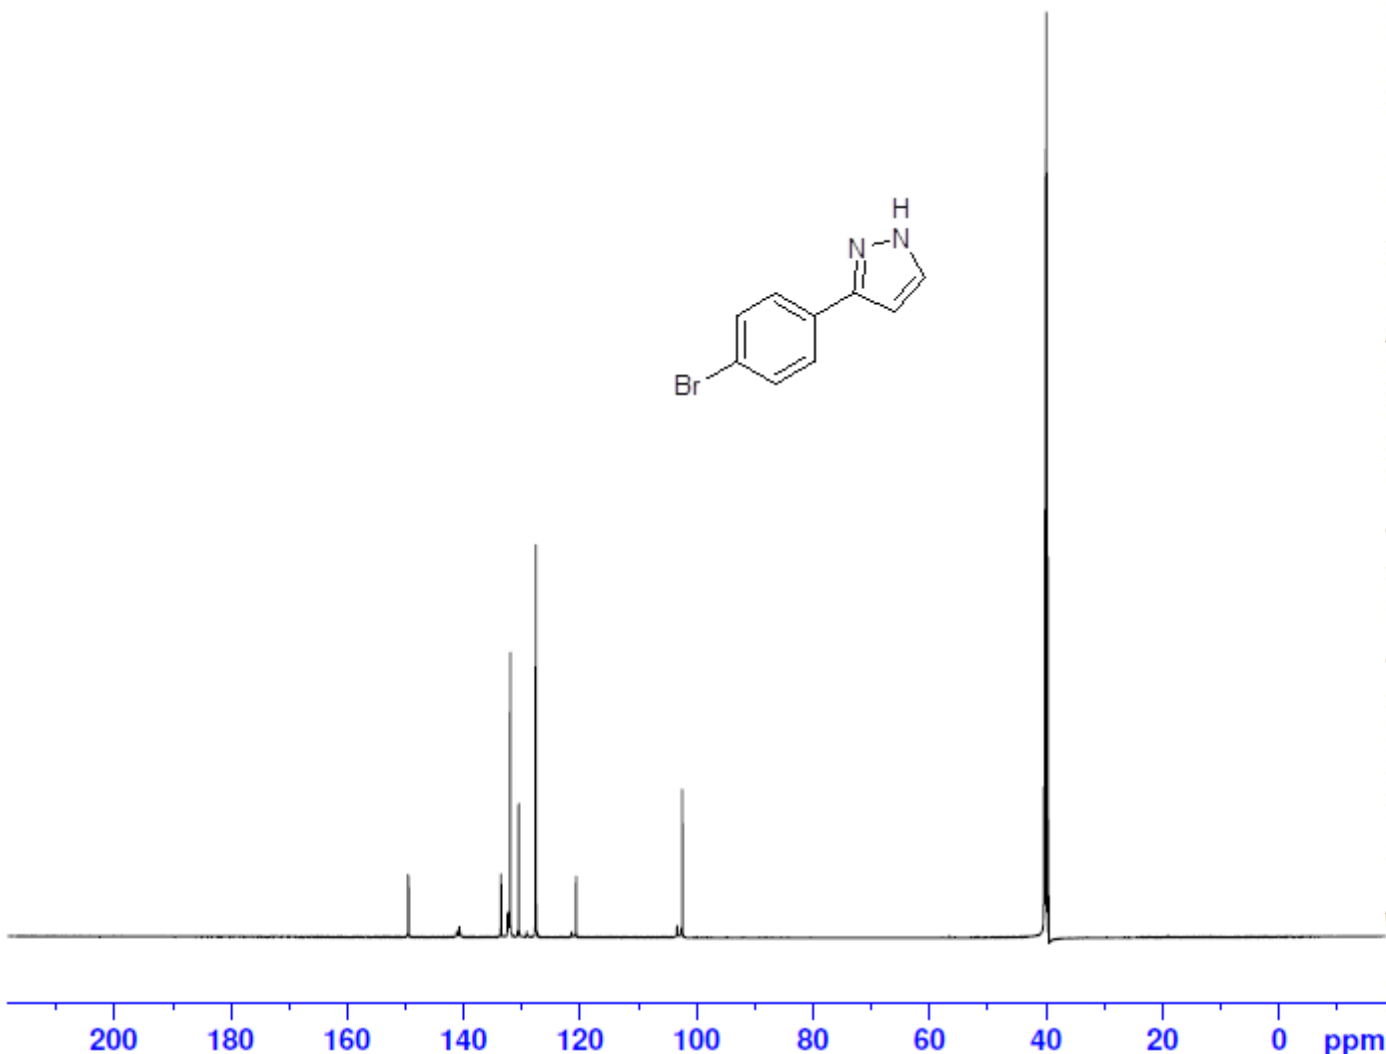

<sup>13</sup>C NMR SPECTRA OF COMPOUND P11

PROTON DMSO {C:\Bruker\TOPSPIN} abari 43

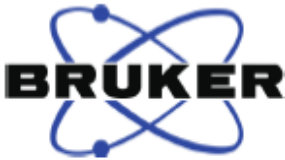

Current Data Parameters  
NAME drMashooq-PD-1-R  
EXPNO 12  
PROCNO 1

F2 - Acquisition Parameters  
Date\_ 20181018  
Time 14.22  
INSTRUM spect  
PROBHD 5 mm CPTCI 1H-  
PULPROG zg30  
TD 65536  
SOLVENT DMSO  
NS 16  
DS 2  
SWH 14097.744 Hz  
FIDRES 0.215115 Hz  
AQ 2.3243434 sec  
RG 12.56  
DW 35.467 usec  
DE 31.86 usec  
TE 295.0 K  
D1 1.00000000 sec  
TD0 1

----- CHANNEL f1 -----  
SFO1 700.1743238 MHz  
NUC1 1H  
P1 8.00 usec  
PLW1 9.64999962 W

F2 - Processing parameters  
SI 65536  
SF 700.1700000 MHz  
WDW EM  
SSB 0  
LB 0.30 Hz  
GB 0  
PC 1.00

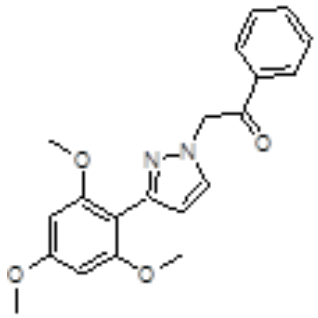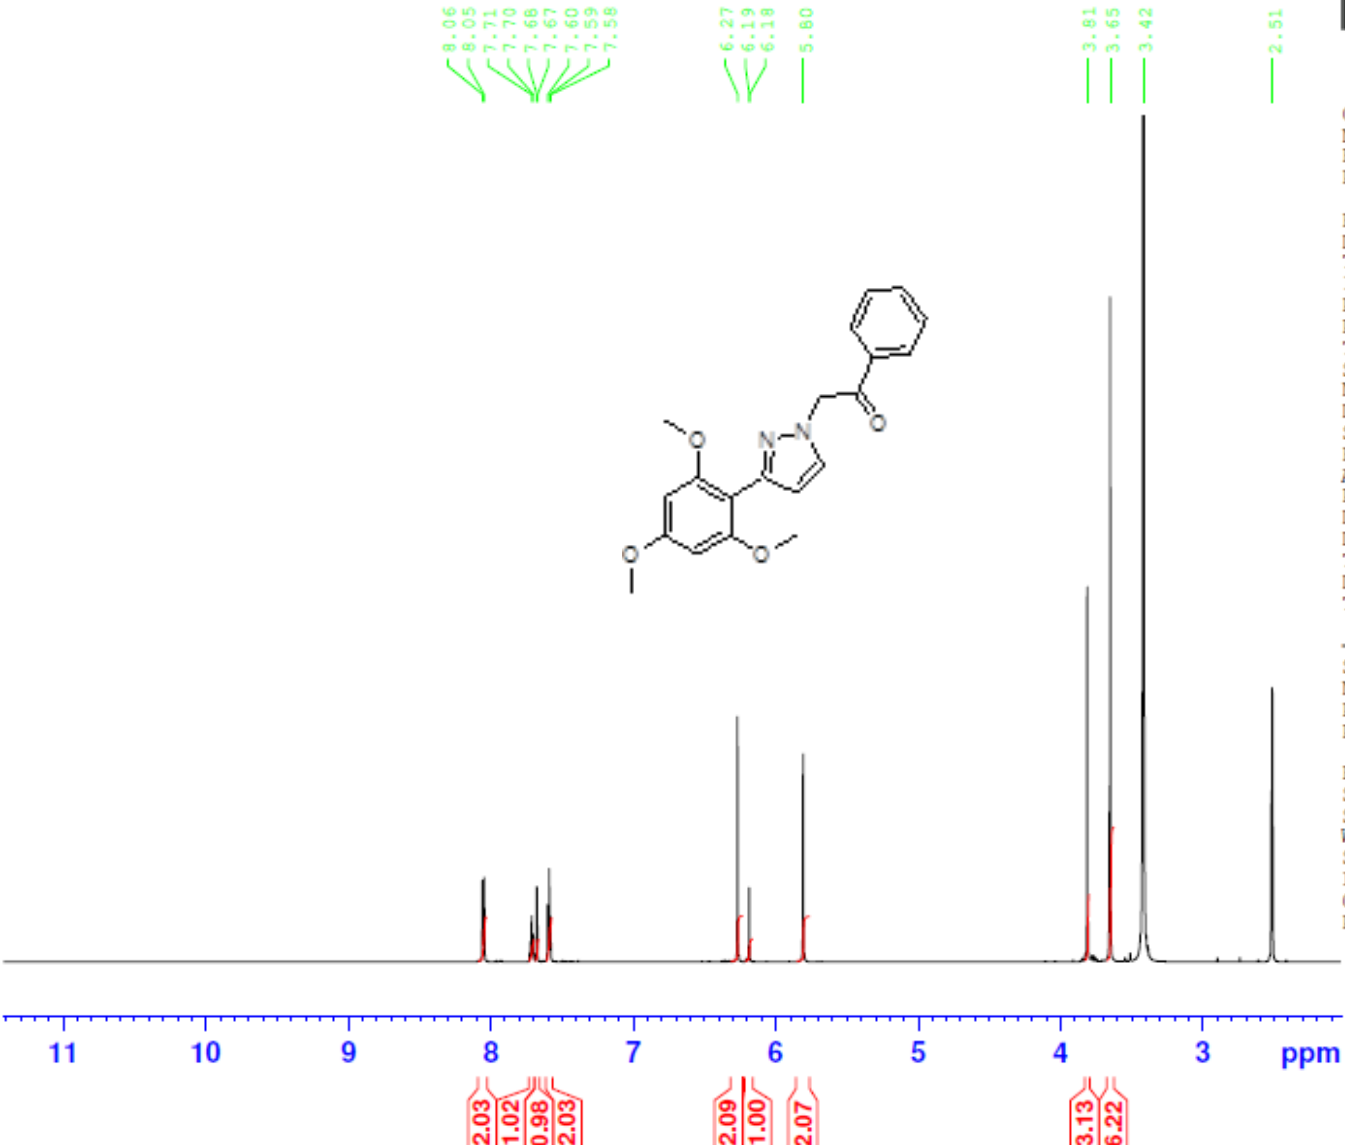

<sup>1</sup>H NMR SPECTRA OF COMPOUND P12

C13CPD DMSO {C:\Bruker\TOPSPIN} abari 43



Current Data Parameters  
NAME drMashooq-PD-1-R  
EXPNO 13  
PROCNO 1

F2 - Acquisition Parameters  
Date\_ 20181018  
Time 17.16  
INSTRUM spect  
PROBHD 5 mm CPTCI 1H-  
PULPROG zgpg30  
TD 65536  
SOLVENT DMSO  
NS 2000  
DS 4  
SWH 41666.668 Hz  
FIDRES 0.635783 Hz  
AQ 0.7864320 sec  
RG 172.3  
DW 12.000 usec  
DE 18.00 usec  
TE 295.0 K  
D1 2.00000000 sec  
D11 0.03000000 sec  
TD0 1

----- CHANNEL f1 -----  
SFO1 176.0754915 MHz  
NUC1 13C  
P1 12.00 usec  
PLW1 121.00000000 W

----- CHANNEL f2 -----  
SFO2 700.1728007 MHz  
NUC2 1H  
CPDPRG[2] waltz16  
PCPD2 65.00 usec  
PLW2 9.64999962 W  
PLW12 0.14618000 W  
PLW13 0.06176000 W

F2 - Processing parameters  
SI 32768  
SF 176.0578870 MHz  
WDW EM  
SSB 0  
LB 1.00 Hz  
GB 0  
PC 1.40

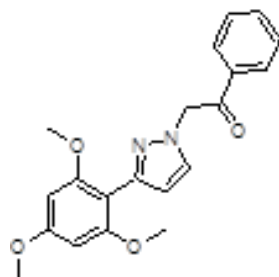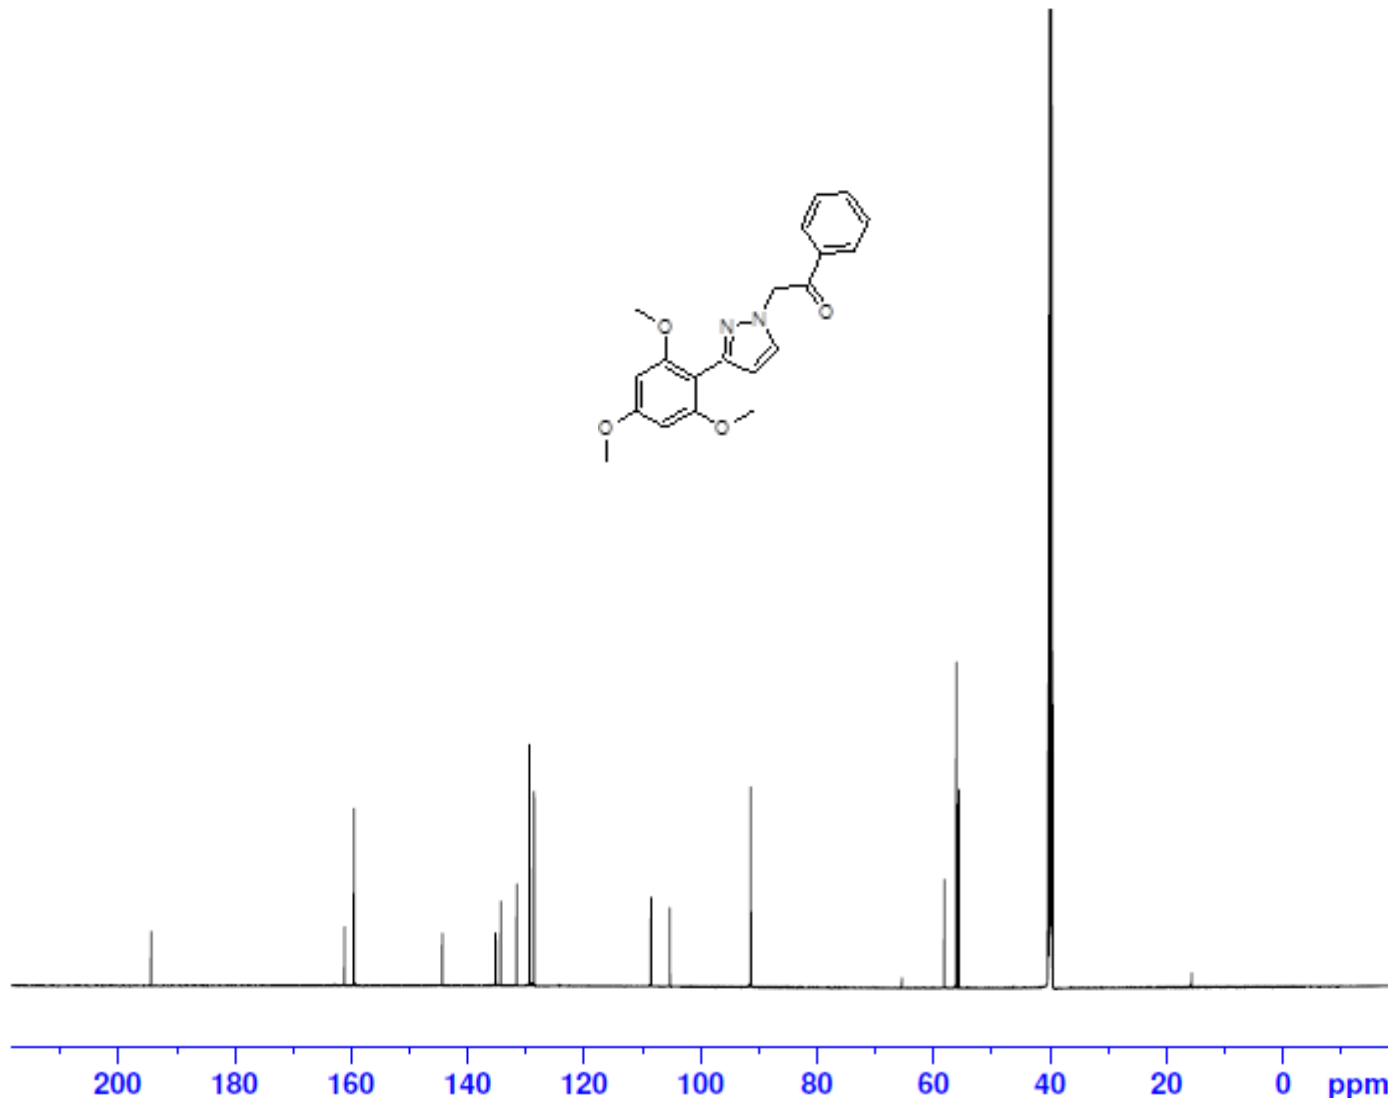

<sup>13</sup>C NMR SPECTRA OF COMPOUND P12

PROTON DMSO {C:\Bruker\TOPSPIN} abari 10



Current Data Parameters  
NAME drMashooq-PD2  
EXPNO 10  
PROCNO 1

F2 - Acquisition Parameters  
Date\_ 20181113  
Time 22.29  
INSTRUM spect  
PROBHD 5 mm CPTCI 1H-  
PULPROG zg30  
TD 65536  
SOLVENT DMSO  
NS 16  
DS 2  
SWH 14097.744 Hz  
FIDRES 0.215115 Hz  
AQ 2.3243434 sec  
RG 8.97  
DW 35.467 usec  
DE 31.86 usec  
TE 295.0 K  
D1 1.00000000 sec  
TD0 1

----- CHANNEL f1 -----  
SFO1 700.1743238 MHz  
NUC1 1H  
P1 8.00 usec  
PLW1 9.64999962 W

F2 - Processing parameters  
SI 65536  
SF 700.1700000 MHz  
WDW EM  
SSB 0  
LB 0.30 Hz  
GB 0  
PC 1.00

+//...//...//info

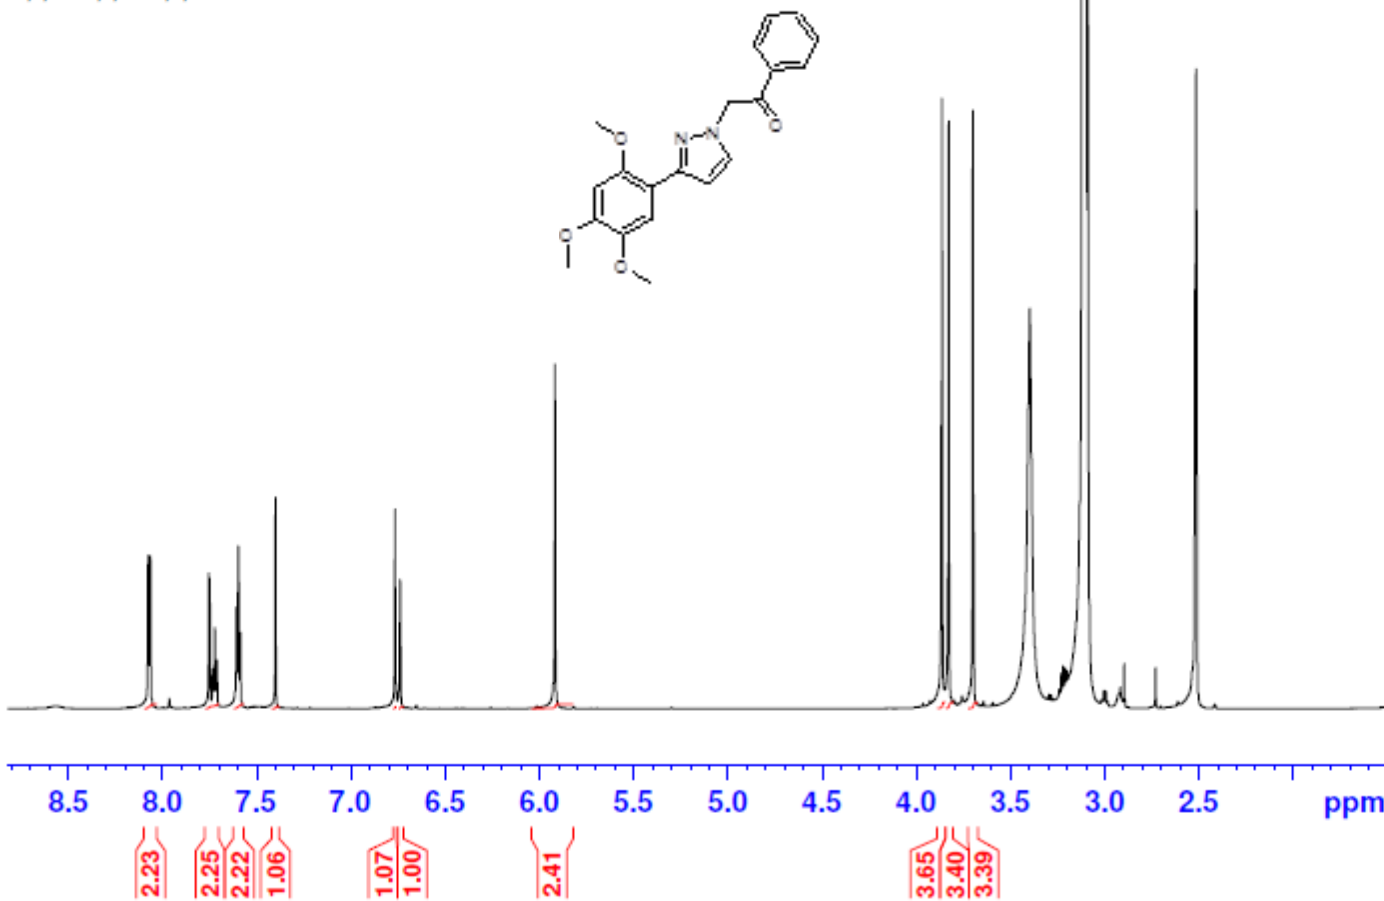

<sup>1</sup>H NMR SPECTRA OF COMPOUND P13

C13CPD DMSO {C:\Bruker\TOPSPIN} abari 10

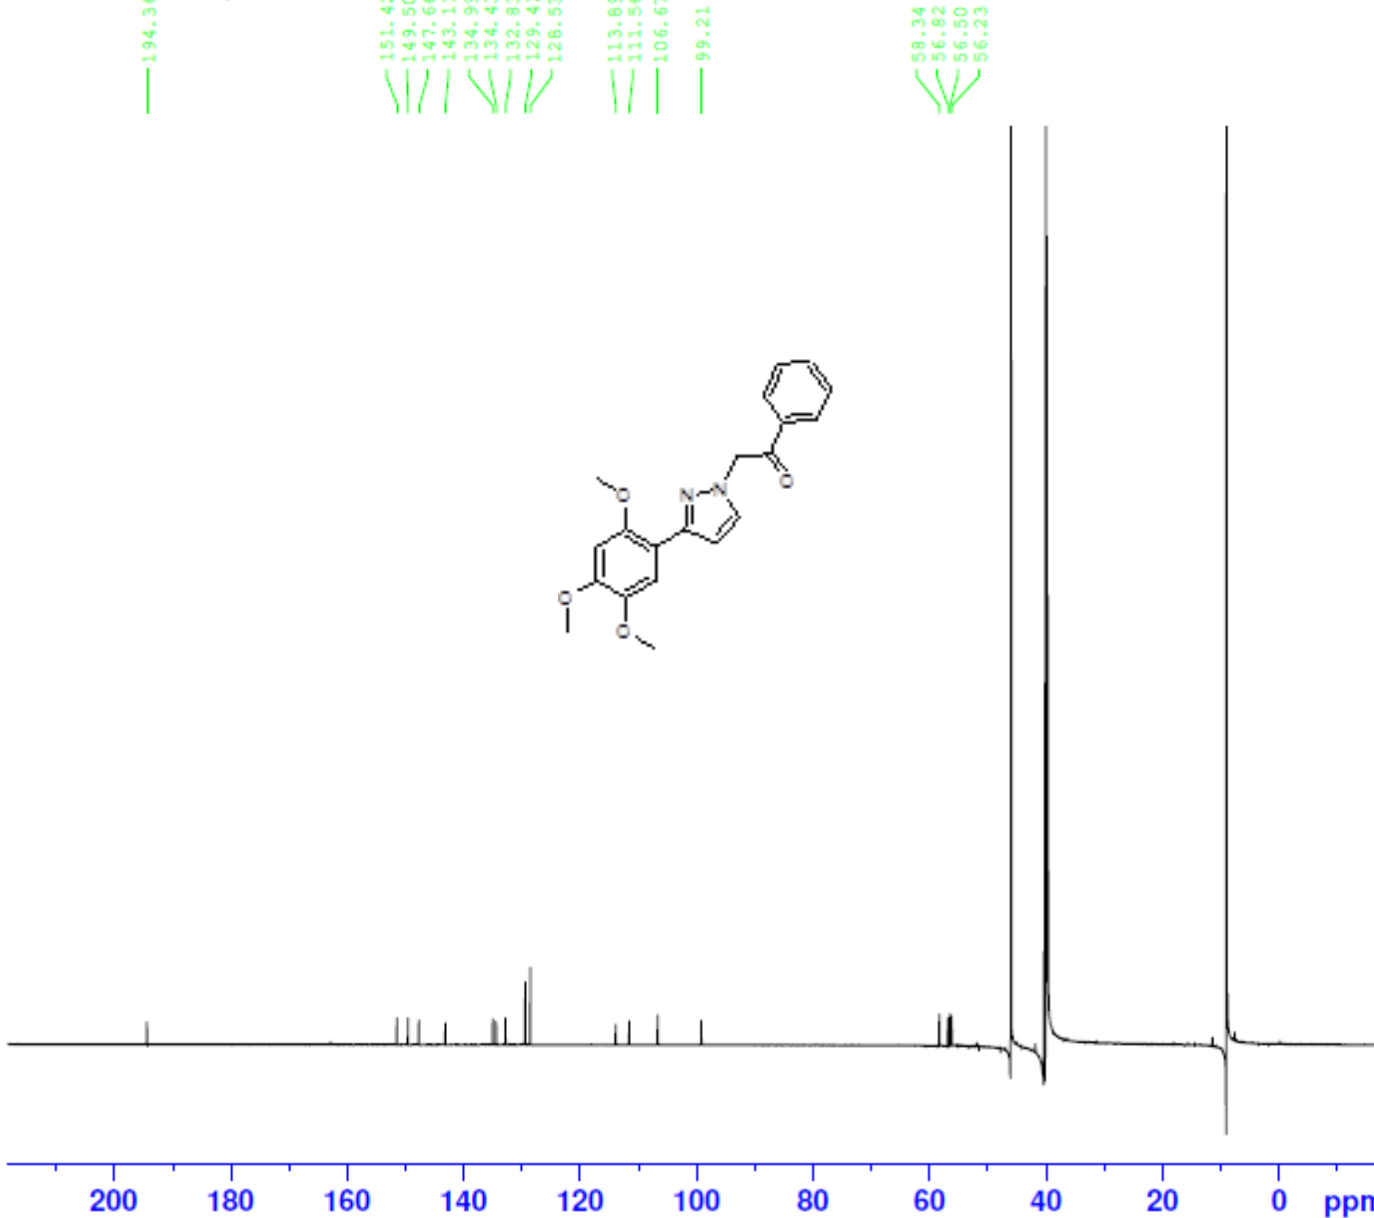

Current Data Parameters

NAME drMashooq-PD2  
EXPNO 11  
PROCNO 1

F2 - Acquisition Parameters

Date\_ 20181113  
Time 23.19  
INSTRUM spect  
PROBHD 5 mm CPTCI 1H-  
PULPROG zgpg30  
TD 65536  
SOLVENT DMSO  
NS 1024  
DS 4  
SWH 41666.668 Hz  
FIDRES 0.635783 Hz  
AQ 0.7864320 sec  
RG 172.3  
DW 12.000 usec  
DE 18.00 usec  
TE 295.0 K  
D1 2.00000000 sec  
D11 0.03000000 sec  
TD0 1

----- CHANNEL f1 -----

SFO1 176.0754915 MHz  
NUC1 13C  
P1 12.00 usec  
PLW1 121.00000000 W

----- CHANNEL f2 -----

SFO2 700.1728007 MHz  
NUC2 1H  
CPDPRG[2] waltz16  
PCPD2 65.00 usec  
PLW2 9.64999962 W  
PLW12 0.14618000 W  
PLW13 0.06176000 W

F2 - Processing parameters

SI 32768  
SF 176.0578870 MHz  
WDW EM  
SSB 0  
LB 1.00 Hz  
GB 0  
PC 1.40

<sup>13</sup>C NMR SPECTRA OF COMPOUND P13



PROTON DMSO (C:\Bruker\TOPSPIN) abari 11

+//...//...//info

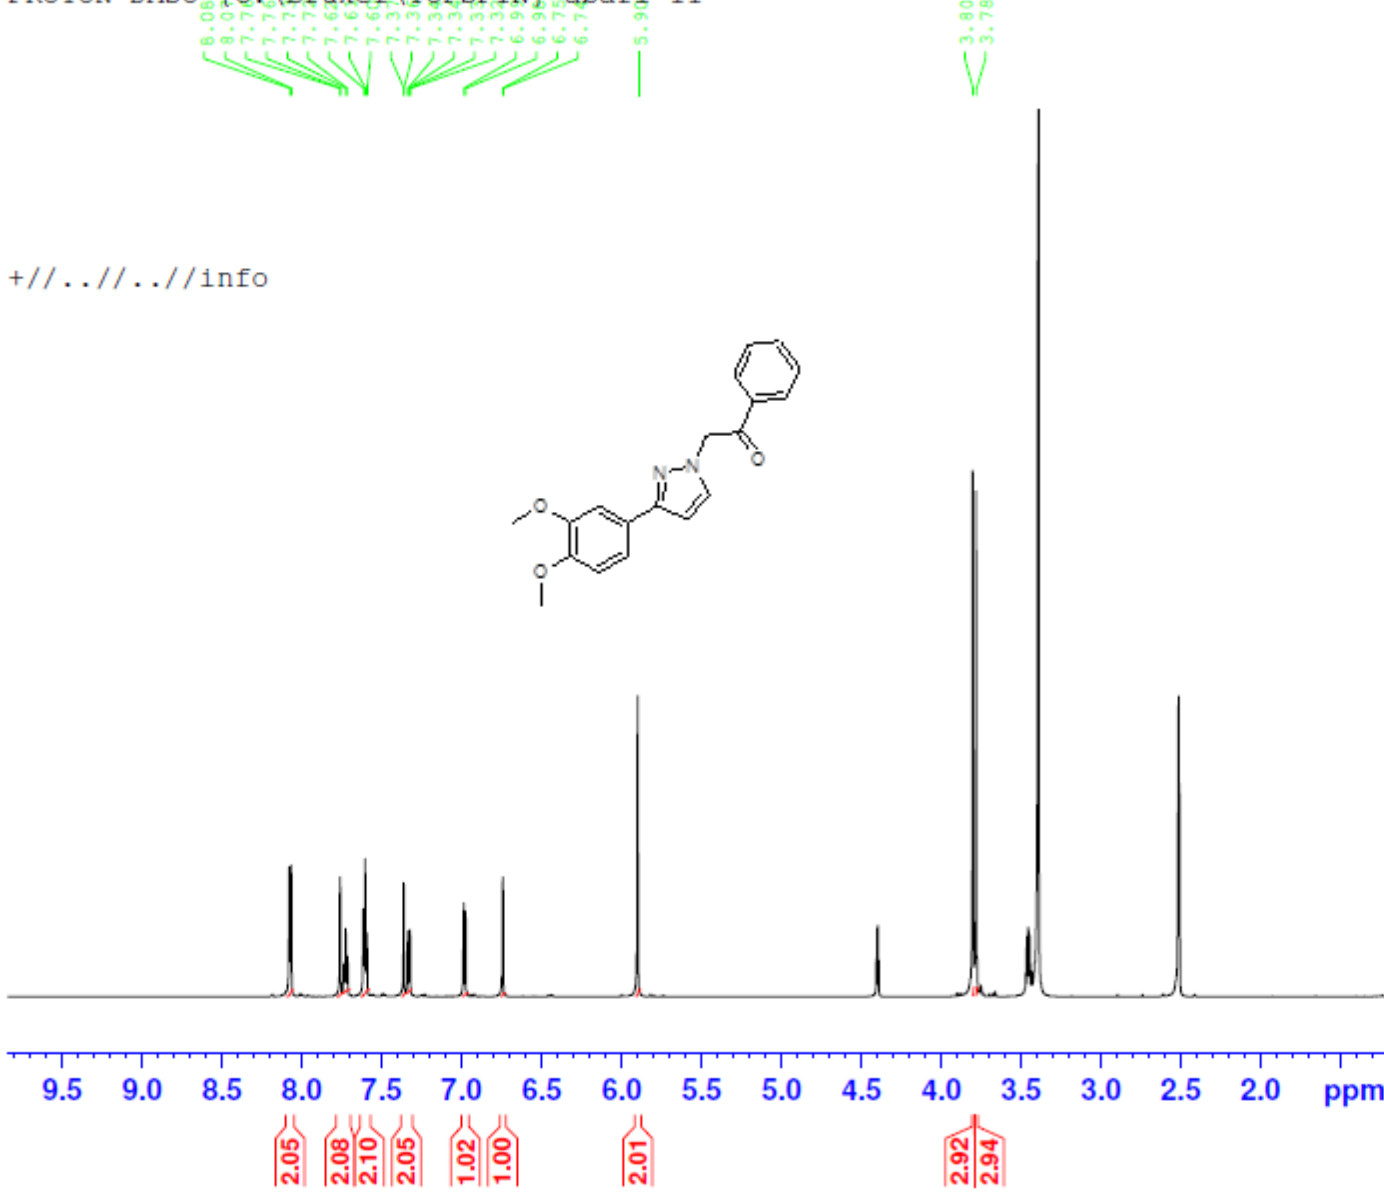

Current Data Parameters  
NAME drMashooq-PD3  
EXPNO 10  
PROCNO 1

F2 - Acquisition Parameters  
Date\_ 20181113  
Time 23.24  
INSTRUM spect  
PROBHD 5 mm CPTCI 1H-  
PULPROG zg30  
TD 65536  
SOLVENT DMSO  
NS 16  
DS 2  
SWH 14097.744 Hz  
FIDRES 0.215115 Hz  
AQ 2.3243434 sec  
RG 14.16  
DW 35.467 usec  
DE 31.86 usec  
TE 295.0 K  
D1 1.00000000 sec  
TD0 1

----- CHANNEL f1 -----  
SFO1 700.1743238 MHz  
NUC1 1H  
P1 8.00 usec  
PLW1 9.64999962 W

F2 - Processing parameters  
SI 65536  
SF 700.1700000 MHz  
WDW EM  
SSB 0  
LB 0.30 Hz  
GB 0  
PC 1.00

<sup>1</sup>H NMR SPECTRA OF COMPOUND P14

C13CPD DMSO {C:\Bruker\TOPSPIN} abari 11



Current Data Parameters  
NAME drMashooq-PD3  
EXPNO 11  
PROCNO 1

F2 - Acquisition Parameters  
Date\_ 20181114  
Time 0.14  
INSTRUM spect  
PROBHD 5 mm CPTCI 1H-  
PULPROG zgpg30  
TD 65536  
SOLVENT DMSO  
NS 1024  
DS 4  
SWH 41666.668 Hz  
FIDRES 0.635783 Hz  
AQ 0.7864320 sec  
RG 172.3  
DW 12.000 usec  
DE 18.00 usec  
TE 295.0 K  
D1 2.00000000 sec  
D11 0.03000000 sec  
TD0 1

----- CHANNEL f1 -----  
SFO1 176.0754915 MHz  
NUC1 13C  
P1 12.00 usec  
PLW1 121.00000000 W

----- CHANNEL f2 -----  
SFO2 700.1728007 MHz  
NUC2 1H  
CPDPRG[2] waltz16  
PCPD2 65.00 usec  
PLW2 9.64999962 W  
PLW12 0.14618000 W  
PLW13 0.06176000 W

F2 - Processing parameters  
SI 32768  
SF 176.0578870 MHz  
WDW EM  
SSB 0  
LB 1.00 Hz  
GB 0  
PC 1.40

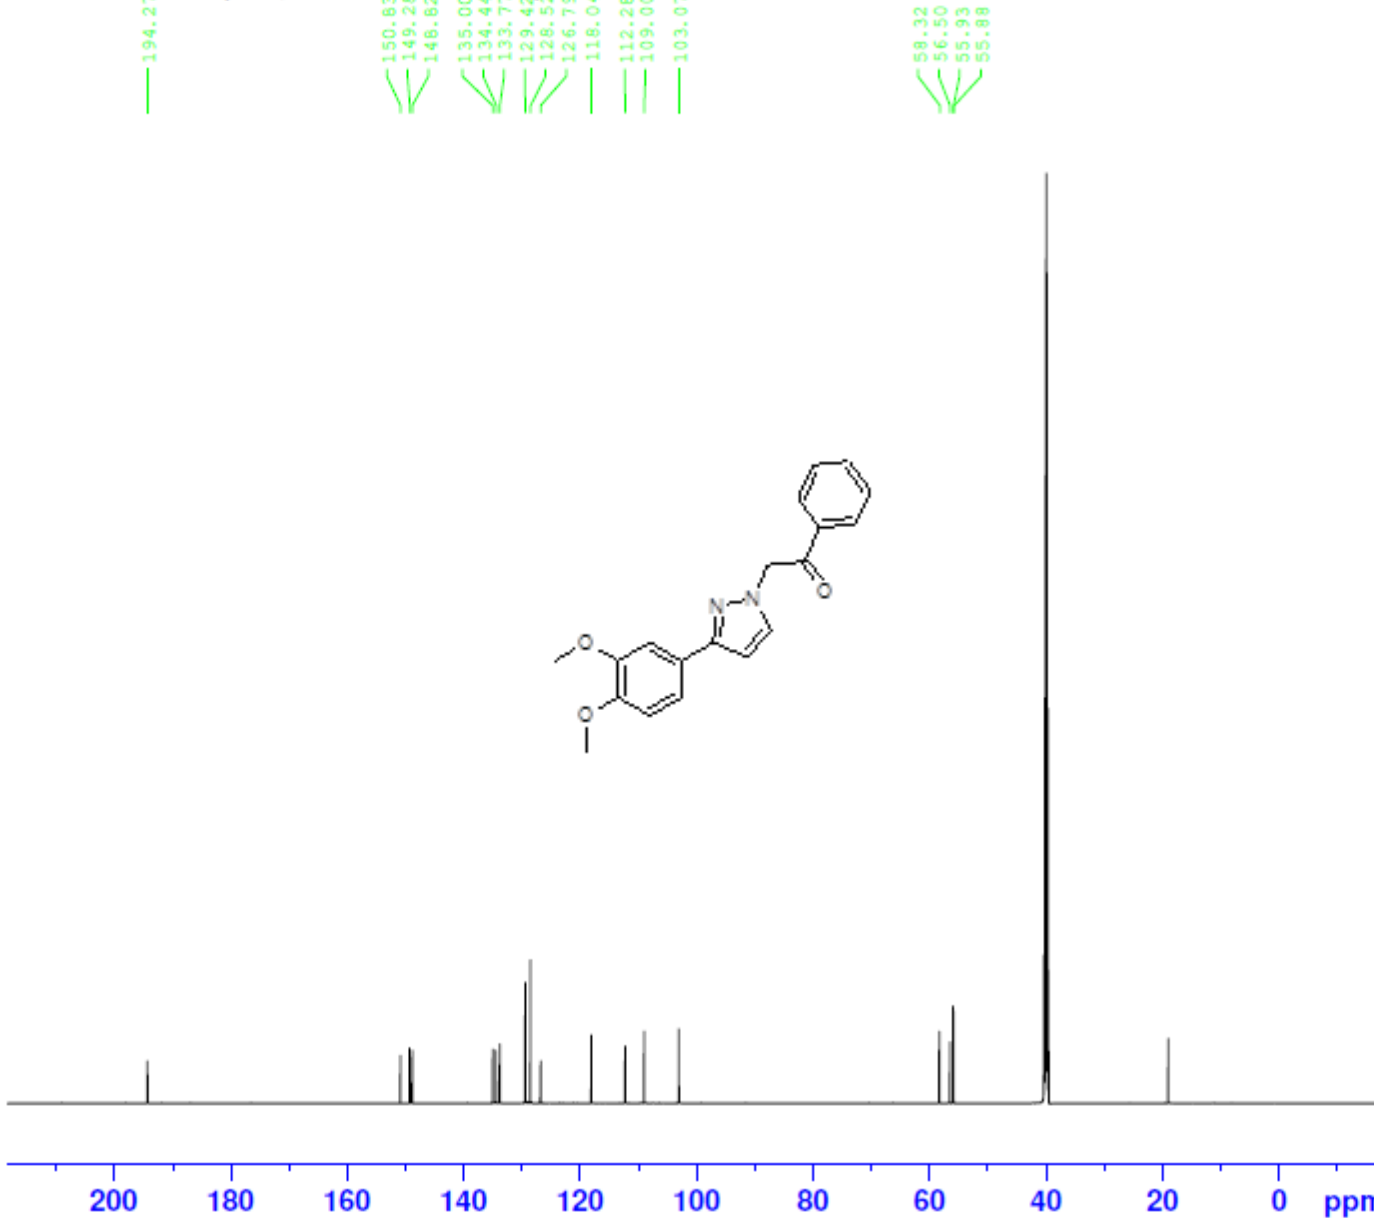

<sup>13</sup>C NMR SPECTRA OF COMPOUND P14

PROTON DMSO (C:\Bruker\TOPSPIN) abar1 13



Current Data Parameters  
NAME drMashooq-PD12  
EXPNO 10  
PROCNO 1

F2 - Acquisition Parameters  
Date\_ 20181114  
Time 1.13  
INSTRUM spect  
PROBHD 5 mm CPTCI 1H-  
PULPROG zg30  
TD 65536  
SOLVENT DMSO  
NS 16  
DS 2  
SWH 14097.744 Hz  
FIDRES 0.215115 Hz  
AQ 2.3243434 sec  
RG 12.56  
DW 35.467 usec  
DE 31.86 usec  
TE 295.0 K  
D1 1.00000000 sec  
TD0 1

----- CHANNEL f1 -----  
SFO1 700.1743238 MHz  
NUC1 1H  
P1 8.00 usec  
PLW1 9.64999962 W

F2 - Processing parameters  
SI 65536  
SF 700.1700000 MHz  
WDW EM  
SSB 0  
LB 0.30 Hz  
GB 0  
PC 1.00

+//...//...//info

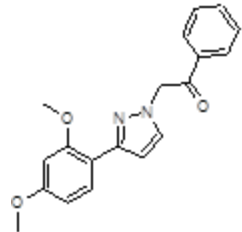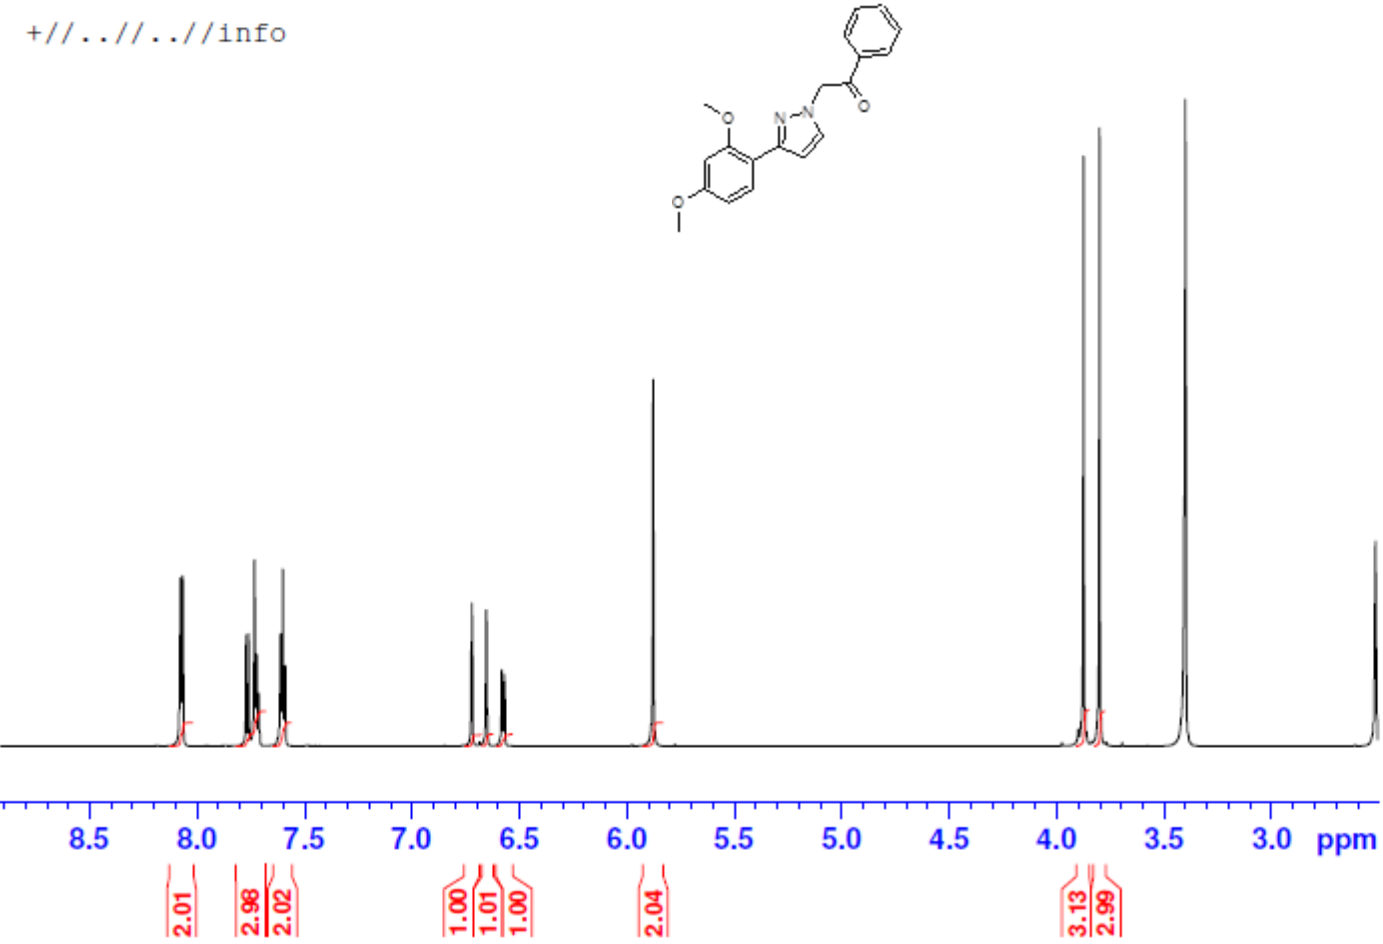

<sup>1</sup>H NMR SPECTRA OF COMPOUND P15

C13CPD DMSO {C:\Bruker\TOPSPIN} abari 13



Current Data Parameters  
NAME drMashooq-PD12  
EXPNO 11  
PROCNO 1

F2 - Acquisition Parameters  
Date\_ 20181114  
Time 2.04  
INSTRUM spect  
PROBHD 5 mm CPTCI 1H-  
PULPROG zgpg30  
TD 65536  
SOLVENT DMSO  
NS 1024  
DS 4  
SWH 41666.668 Hz  
FIDRES 0.635783 Hz  
AQ 0.7864320 sec  
RG 172.3  
DW 12.000 usec  
DE 18.00 usec  
TE 295.0 K  
D1 2.00000000 sec  
D11 0.03000000 sec  
TD0 1

----- CHANNEL f1 -----  
SFO1 176.0754915 MHz  
NUC1 13C  
P1 12.00 usec  
PLW1 121.00000000 W

----- CHANNEL f2 -----  
SFO2 700.1728007 MHz  
NUC2 1H  
CPDPRG2 waltz16  
PCPD2 65.00 usec  
PLW2 9.64999962 W  
PLW12 0.14618000 W  
PLW13 0.06176000 W

F2 - Processing parameters  
SI 32768  
SF 176.0578870 MHz  
WDW EM  
SSB 0  
LB 1.00 Hz  
GB 0  
PC 1.40

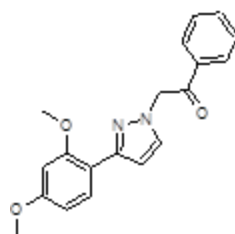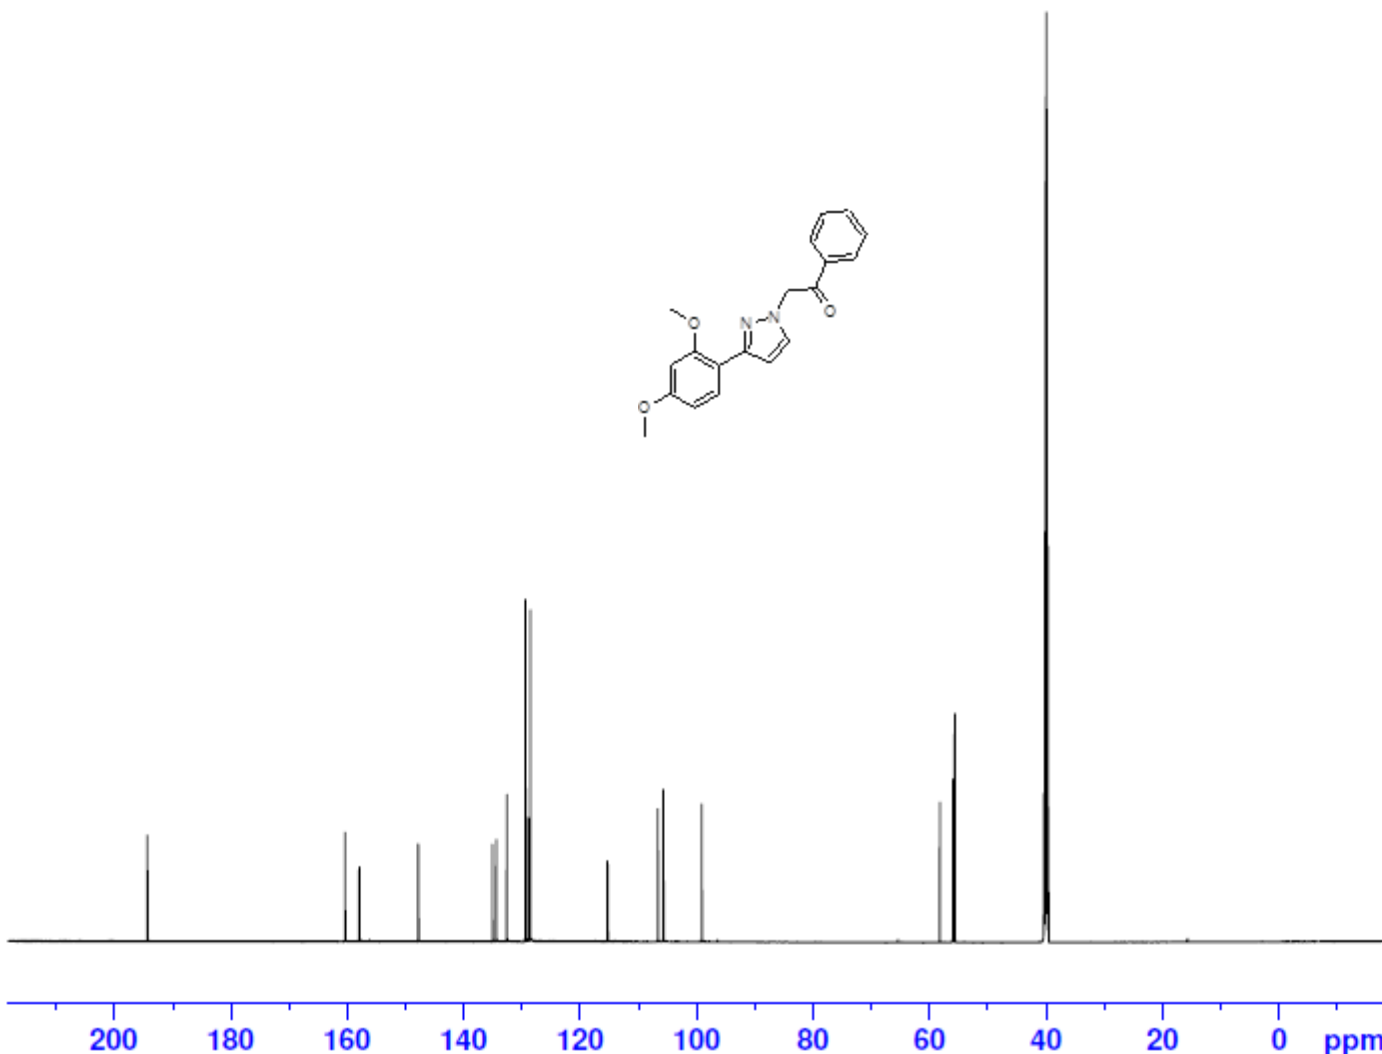

<sup>13</sup>C NMR SPECTRA OF COMPOUND P15

PROTON DMSO {C:\Bruker\TOPSPIN} abari 12



Current Data Parameters  
NAME drMashooq-PD7  
EXPNO 10  
PROCNO 1

F2 - Acquisition Parameters  
Date\_ 20181114  
Time 0.18  
INSTRUM spect  
PROBHD 5 mm CPTCI 1H-  
PULPROG zg30  
TD 65536  
SOLVENT DMSO  
NS 16  
DS 2  
SWH 14097.744 Hz  
FIDRES 0.215115 Hz  
AQ 2.3243434 sec  
RG 31.35  
DW 35.467 usec  
DE 31.86 usec  
TE 295.0 K  
D1 1.00000000 sec  
TD0 1

----- CHANNEL f1 -----  
SFO1 700.1743238 MHz  
NUC1 1H  
P1 8.00 usec  
PLW1 9.64999962 W

F2 - Processing parameters  
SI 65536  
SF 700.1700000 MHz  
WDW EM  
SSB 0  
LB 0.30 Hz  
GB 0  
PC 1.00

+//...//...//info

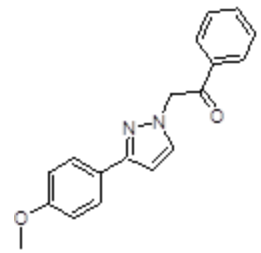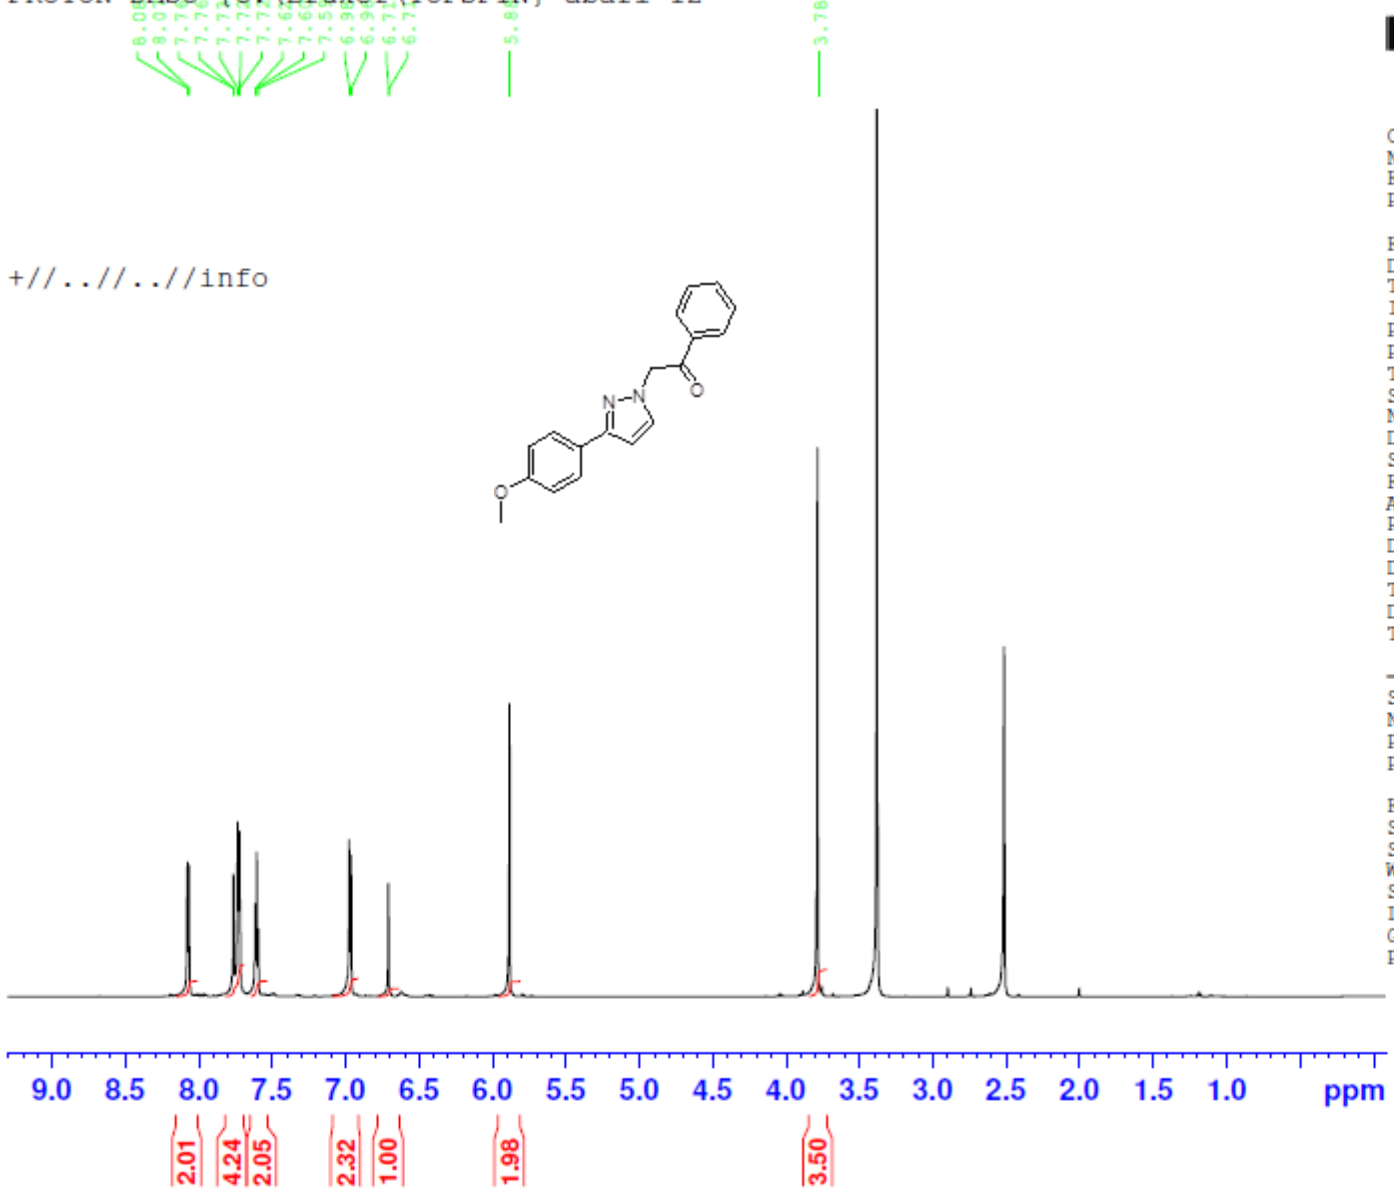

<sup>1</sup>H NMR SPECTRA OF COMPOUND P16

C13CPD DMSO {C:\Bruker\TOPSPIN} abari 12



Current Data Parameters  
NAME drMashooq-PD7  
EXPNO 11  
PROCNO 1

F2 - Acquisition Parameters  
Date\_ 20181114  
Time 1.08  
INSTRUM spect  
PROBHD 5 mm CPTCI 1H-  
PULPROG zgpg30  
TD 65536  
SOLVENT DMSO  
NS 1024  
DS 4  
SWH 41666.668 Hz  
FIDRES 0.635783 Hz  
AQ 0.7864320 sec  
RG 172.3  
DW 12.000 usec  
DE 18.00 usec  
TE 295.0 K  
D1 2.00000000 sec  
D11 0.03000000 sec  
TD0 1

----- CHANNEL f1 -----  
SFO1 176.0754915 MHz  
NUC1 13C  
P1 12.00 usec  
PLW1 121.00000000 W

----- CHANNEL f2 -----  
SFO2 700.1728007 MHz  
NUC2 1H  
CPDPRG[2] waltz16  
PCPD2 65.00 usec  
PLW2 9.64999962 W  
PLW12 0.14618000 W  
PLW13 0.06176000 W

F2 - Processing parameters  
SI 32768  
SF 176.0578870 MHz  
WDW EM  
SSB 0  
LB 1.00 Hz  
GB 0  
PC 1.40

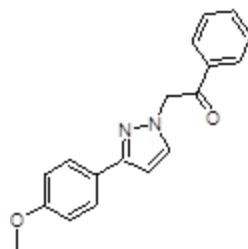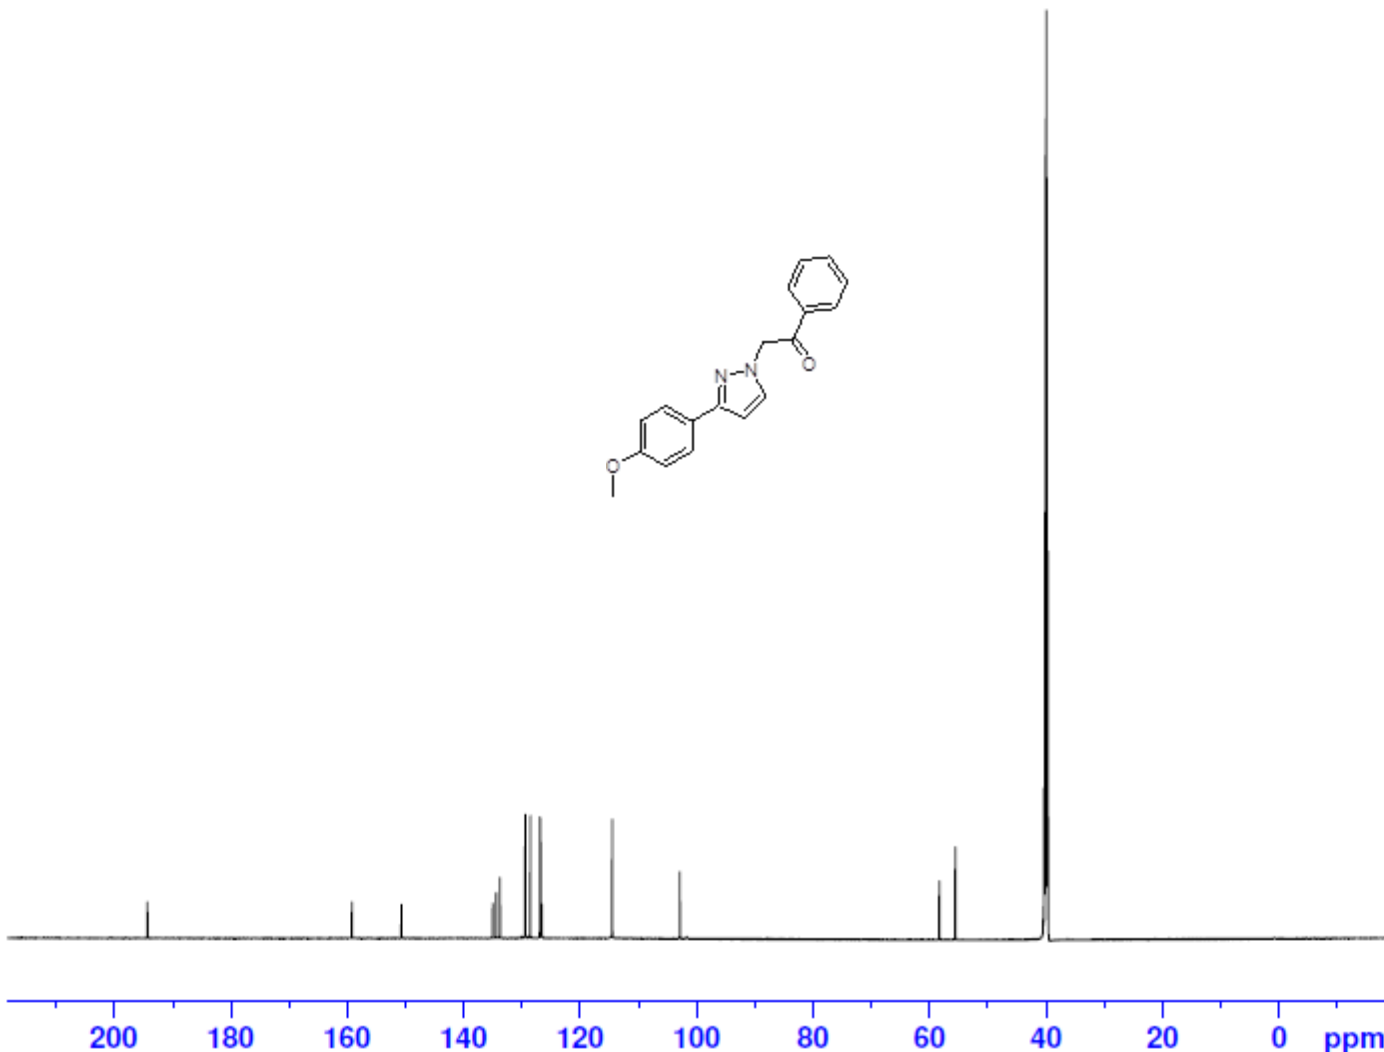

<sup>13</sup>C NMR SPECTRA OF COMPOUND P16
